# Supplementary material for: Proteomic response of marine-derived Staphylococcus cohnii #NIOSBK35 to varying Cr(vi) concentrations
Source: Royal Society of Chemistry journal article supplement (doi:10.1039/c9mt00089e), 2019-06-13
Supplement: c9mt00089e1.pdf [file c9mt00089e1.pdf]

**Consolidated list of up-regulated proteins expressed at different Cr (VI) concentrations at time points**

| <b>Cr (VI)<br/>concentration</b> | <b>6 h</b>                      | <b>9 h</b>                                          | <b>12 h</b>                         | <b>18 h</b>                                                      | <b>24 h</b>                                         | <b>36 h</b>                                                    |
|----------------------------------|---------------------------------|-----------------------------------------------------|-------------------------------------|------------------------------------------------------------------|-----------------------------------------------------|----------------------------------------------------------------|
|                                  | ComA2 family protein            | 2-isopropylmalate synthase                          | 50S ribosomal protein L36           | 1-(5-phosphoribosyl)-5-amino-4-imidazole-carboxylate carboxylase | 23S rRNA (uracil-5-)-methyltransferase RumA         | 2-dehydropantoate 2-reductase                                  |
|                                  | choline transporter             | 50S ribosomal protein L28                           | NAD(P)H-dependent oxidoreductase    | 2-isopropylmalate synthase                                       | ATP-dependent Clp protease ATP-binding subunit ClpX | 50S ribosomal protein L33                                      |
|                                  | dihydrofolate reductase         | 50S ribosomal protein L33                           | dihydrofolate reductase             | 30S ribosomal protein S14                                        | DNA polymerase III subunit alpha                    | CDP-glycerol--poly(glycerophosphate) glycerophosphotransferase |
|                                  | hypothetical protein XA21_07930 | ATP-dependent Clp protease ATP-binding subunit ClpX | hypothetical protein BSF33_09680    | 30S ribosomal protein S21                                        | DNA polymerase III subunit gamma/tau                | DNA polymerase III subunit gamma/tau                           |
|                                  | methionine--tRNA ligase         | ATPase                                              | magnesium transporter CorA          | 4-aminobutyrate--2-oxoglutarate transaminase                     | DNA-binding response regulator                      | Glutamyl endopeptidase precursor, serine proteinase SspA       |
|                                  | pathogenicity island protein    | DNA mismatch repair protein MutS                    | polysaccharide biosynthesis protein | ATP-dependent DNA helicase RecG                                  | Ferredoxin-dependent glutamate synthase             | GntR family transcriptional regulator                          |

|                                                    |                                              |                                                         |                                         |                                                      |
|----------------------------------------------------|----------------------------------------------|---------------------------------------------------------|-----------------------------------------|------------------------------------------------------|
| DNA polymerase III subunit alpha                   | recombination/mobilization protein (plasmid) | CDP-glycerol:glycerophosphate glycerophosphotransferase | GNAT family N-acetyltransferase         | dihydroxy-acid dehydratase                           |
| GNAT family N-acetyltransferase                    | transposase A (plasmid)                      | D-ribose ABC transporter substrate-binding protein      | Short-chain dehydrogenase/reductase SDR | glutamate synthase                                   |
| HAD family hydrolase                               |                                              | DNA polymerase X family                                 | Siderophore biosynthesis protein        | hypothetical protein                                 |
| NAD synthetase                                     |                                              | GTP-binding protein                                     | alkyl hydroperoxide reductase           | hypothetical protein, partial                        |
| NAD-dependent succinate-semialdehyde dehydrogenase |                                              | HAD family hydrolase                                    | amino acid ABC transporter permease     | methionine ABC transporter substrate-binding protein |
| Short-chain dehydrogenase/reductase SDR            |                                              | Mercuric ion reductase                                  | beta-galactosidase                      | methionine--tRNA ligase                              |
| Uncharacterised protein                            |                                              | N-acetylmuramic acid-6-phosphate etherase               | deoxyribose-phosphate aldolase          | pathogenicity island protein                         |
| asparagine--tRNA ligase                            |                                              | NAD(P)H-dependent oxidoreductase                        | formyltetrahydrofolate deformylase      | preprotein translocase subunit YajC                  |
| class II fumarate hydratase                        |                                              | Short-chain dehydrogenase/reductase SDR                 | glutamate ligase                        | sodium:proton antiporter                             |
| deoxyribose-phosphate aldolase                     |                                              | VOC family protein                                      | lipase                                  | sulfate adenylyltransferase                          |

100 mg L-1

dihydrofolate  
reductase

excinuclease ABC  
subunit B

glutamate ligase

hsp90-like protein

hypothetical protein  
AXY36\_09940  
hypothetical protein,  
partial

lipoyl synthase

magnesium  
transporter CorA  
major facilitator  
superfamily protein

mercuric reductase

methicillin resistance  
protein  
methionine--tRNA  
ligase

nitroreductase

oxidoreductase

acetyl-CoA  
carboxylase  
carboxyltransferase  
subunit alpha

alanine racemase

alkyl hydroperoxide  
reductase

alpha,alpha-  
phosphotrehalase

asparagine--tRNA  
ligase

chorismate synthase

damage-inducible  
protein CinA  
dihydroorotate  
dehydrogenase

elongation factor Ts

glutamate synthase  
subunit alpha

hsp90-like protein

hypothetical protein  
A4A82\_06020

hypothetical protein  
A4A82\_09210

hypothetical protein  
A4A82\_13105

magnesium  
transporter CorA

pathogenicity island  
protein

phosphoglyceromuta  
se

recombination/mobili  
zation protein  
(plasmid)

sulfate  
adenylyltransferase

valine--tRNA ligase

transcriptional  
regulator

universal stress  
protein

preprotein  
translocase subunit  
YajC  
proline:sodium  
symporter PutP  
succinate  
dehydrogenase  
sulfate  
adenylyltransferase  
tRNA uridine(34) 5-  
carboxymethylamino  
methyl synthesis  
enzyme MnmG  
urease subunit  
gamma

hypothetical protein  
AXY36\_05920

hypothetical protein  
AXY36\_09360

hypothetical protein  
AXY36\_09955

hypothetical protein  
BSF33\_09455

hypothetical protein  
RES11\_06070

hypothetical protein  
RES11\_07055

hypothetical protein  
UF66\_0386

hypothetical protein  
UF66\_0831

hypothetical protein  
XA21\_08735

hypothetical protein  
XA21\_11195

hypothetical protein  
XA21\_11670

lysyl-tRNA

synthetase

multidrug ABC

transporter ATP-

binding protein

multidrug transporter

nicotinate  
phosphoribosyltransf  
erase  
nitronate  
monooxygenase  
phosphogluconate  
dehydrogenase  
(NADP(+)-  
dependent,  
decarboxylating)  
phosphoribosylamino  
imidazolesuccinocar  
boxamide synthase  
proline:sodium  
symporter PutP  
putative resolvase  
(plasmid)  
pyruvate  
decarboxylase  
recombinase RmuC  
recombination/mobili  
zation protein  
(plasmid)  
restriction  
endonuclease subunit  
M  
sodium-independent  
anion transporter  
sodium:proton  
antiporter

|  |                                      |                           |                                                        |                                                                                                                                                             |                           |                                                             |
|--|--------------------------------------|---------------------------|--------------------------------------------------------|-------------------------------------------------------------------------------------------------------------------------------------------------------------|---------------------------|-------------------------------------------------------------|
|  |                                      |                           |                                                        | succinate-semialdehyde dehydrogenase (NADP(+)) sulfate adenylyltransferase tRNA (adenosine(37)-N6)-dimethylallyltransferase MiaA trehalose operon repressor |                           |                                                             |
|  | 2,5-diketo-D-gluconic acid reductase | 3-oxoacyl-ACP synthase    | 2-oxoglutarate dehydrogenase E1                        | 1,4-dihydroxy-2-naphthoyl-CoA synthase                                                                                                                      | 3-oxoacyl-ACP synthase    | 1,4-dihydroxy-2-naphthoyl-CoA synthase                      |
|  | 23S rRNA methylase (plasmid)         | 30S ribosomal protein S10 | 23S rRNA (adenine(2058)-N(6))-methyltransferase Erm(B) | 2-deoxyribose-5-phosphate aldolase                                                                                                                          | 30S ribosomal protein S10 | 2,3-bisphosphoglycerate-independent phosphoglycerate mutase |
|  | 2-isopropylmalate synthase           | 50S ribosomal protein L1  | 23S rRNA (uracil-5-)-methyltransferase RumA            | 2-oxoglutarate ferredoxin oxidoreductase subunit alpha                                                                                                      | 30S ribosomal protein S13 | 3-hexulose-6-phosphate synthase                             |
|  | 30S ribosomal protein S20            | 50S ribosomal protein L11 | 30S ribosomal protein S15                              | 3-hexulose-6-phosphate synthase                                                                                                                             | 30S ribosomal protein S16 | 30S ribosomal protein S11                                   |
|  | 50S ribosomal protein L32            | 50S ribosomal protein L30 | 30S ribosomal protein S16                              | 3-hydroxyacyl-CoA dehydrogenase                                                                                                                             | 30S ribosomal protein S18 | 30S ribosomal protein S13                                   |

|                                                                                                            |                                                          |                           |                                                  |                              |                           |
|------------------------------------------------------------------------------------------------------------|----------------------------------------------------------|---------------------------|--------------------------------------------------|------------------------------|---------------------------|
| 50S ribosomal protein L36                                                                                  | ABC transporter, ATP-binding protein                     | 30S ribosomal protein S17 | 3-methyl-2-oxobutanoate hydroxymethyltransferase | 30S ribosomal protein S19    | 30S ribosomal protein S15 |
| acetoin utilization protein                                                                                | ATP-dependent Zn metalloproteinase                       | 30S ribosomal protein S19 | 3-oxoacyl-ACP synthase                           | 30S ribosomal protein S3     | 30S ribosomal protein S16 |
| antibiotic ABC transporter ATP-binding protein                                                             | DNA gyrase subunit A                                     | 30S ribosomal protein S20 | 3-oxoacyl-[acyl-carrier protein] reductase       | 30S ribosomal protein S4     | 30S ribosomal protein S20 |
| arginine--tRNA ligase                                                                                      | DNA helicase                                             | 30S ribosomal protein S8  | 30S ribosomal protein S1                         | 30S ribosomal protein S5     | 30S ribosomal protein S3  |
| ATPase                                                                                                     | DNA-directed RNA polymerase subunit beta'                | 50S ribosomal protein L10 | 30S ribosomal protein S10                        | 30S ribosomal protein S6     | 30S ribosomal protein S4  |
| bifunctional N-acetylglucosamine-1-phosphate uridylyltransferase/glucosamine-1-phosphate acetyltransferase | GTP-binding protein TypA                                 | 50S ribosomal protein L23 | 30S ribosomal protein S11                        | 30S ribosomal protein S7     | 30S ribosomal protein S5  |
| chloramphenicol acetyltransferase                                                                          | Glutamyl endopeptidase precursor, serine proteinase SspA | 50S ribosomal protein L27 | 30S ribosomal protein S13                        | 30S ribosomal protein S8     | 30S ribosomal protein S7  |
| chorismate synthase                                                                                        | PTS system N-acetylglucosamine-specific IIBC component   | 50S ribosomal protein L3  | 30S ribosomal protein S15                        | 4-oxalocrotonate tautomerase | 30S ribosomal protein S8  |

|                                               |                                                                                       |                                                                |                           |                              |                           |
|-----------------------------------------------|---------------------------------------------------------------------------------------|----------------------------------------------------------------|---------------------------|------------------------------|---------------------------|
| deoxyribose-phosphate aldolase                | PolC-type DNA polymerase III                                                          | 50S ribosomal protein L30                                      | 30S ribosomal protein S16 | 5'(3')-deoxyribonucleotidase | 30S ribosomal protein S9  |
| diacetyl reductase                            | Serine protease                                                                       | 50S ribosomal protein L31                                      | 30S ribosomal protein S18 | 50S ribosomal protein L1     | 50S ribosomal protein L1  |
| D-lactate dehydrogenase                       | UDP-N-acetylglucosamine 1-carboxyvinyltransferase                                     | 50S ribosomal protein L33                                      | 30S ribosomal protein S19 | 50S ribosomal protein L10    | 50S ribosomal protein L10 |
| DNA polymerase IV                             | UDP-N-acetylmuramoylalanyl-D-glutamyl-2, 6-diaminopimelate--D-alanyl-D-alanine ligase | 8-amino-7-oxononanoate synthase                                | 30S ribosomal protein S2  | 50S ribosomal protein L13    | 50S ribosomal protein L13 |
| DNA polymerase X family                       | aminoglycoside acetyltransferase and aminoglycoside phosphotransferase (plasmid)      | ATP synthase F0F1 subunit delta                                | 30S ribosomal protein S3  | 50S ribosomal protein L14    | 50S ribosomal protein L16 |
| Ferredoxin-dependent glutamate synthase       | arsenate reductase                                                                    | ATP-dependent Clp protease proteolytic subunit                 | 30S ribosomal protein S4  | 50S ribosomal protein L17    | 50S ribosomal protein L17 |
| glutamate synthase subunit alpha              | beta-ketoacyl-[acyl-carrier-protein] synthase II                                      | CDP-glycerol--poly(glycerophosphate) glycerophosphotransferase | 30S ribosomal protein S5  | 50S ribosomal protein L18    | 50S ribosomal protein L18 |
| glycerol phosphate lipoteichoic acid synthase | carbamoyl phosphate synthase large subunit                                            | CTP synthetase                                                 | 30S ribosomal protein S6  | 50S ribosomal protein L21    | 50S ribosomal protein L24 |

|                                         |                                                       |                                                   |                              |                           |                                                |
|-----------------------------------------|-------------------------------------------------------|---------------------------------------------------|------------------------------|---------------------------|------------------------------------------------|
| GNAT family N-acetyltransferase         | cation:proton antiporter                              | D-alanine aminotransferase                        | 30S ribosomal protein S7     | 50S ribosomal protein L22 | 50S ribosomal protein L25                      |
| GntR family transcriptional regulator   | cell division protein FtsW                            | DNA-directed RNA polymerase subunit beta          | 30S ribosomal protein S8     | 50S ribosomal protein L24 | 50S ribosomal protein L27                      |
| HAD family hydrolase                    | cysteine synthase                                     | NAD kinase                                        | 30S ribosomal protein S9     | 50S ribosomal protein L25 | 50S ribosomal protein L4                       |
| helicase-exonuclease AddAB subunit AddB | cytochrome aa3 quinol oxidase subunit II              | Phosphate acetyltransferase                       | 4-oxalocrotonate tautomerase | 50S ribosomal protein L27 | 50S ribosomal protein L5                       |
| hypothetical protein                    | ferrichrome ABC transporter substrate-binding protein | RNA-binding protein S1                            | 5'(3')-deoxyribonucleotidase | 50S ribosomal protein L29 | 50S ribosomal protein L7/L12                   |
| hypothetical protein A4A82_12595        | formate dehydrogenase accessory protein               | RecX family transcriptional regulator             | 50S ribosomal protein L1     | 50S ribosomal protein L3  | ABC transporter ATP-binding protein            |
| hypothetical protein RES10_12085        | fructose-bisphosphate aldolase                        | Translation elongation factor Ts                  | 50S ribosomal protein L10    | 50S ribosomal protein L31 | ATP synthase F0F1 subunit alpha                |
| hypothetical protein UF66_0386          | glycerol-3-phosphate dehydrogenase                    | UDP-N-acetyl-D-galactosamine dehydrogenase        | 50S ribosomal protein L13    | 50S ribosomal protein L33 | ATP-dependent Clp protease proteolytic subunit |
| hypothetical protein UF66_0428          | glycine cleavage system protein H                     | UDP-N-acetylglucosamine 1-carboxyvinyltransferase | 50S ribosomal protein L15    | 50S ribosomal protein L4  | ATP-dependent Zn metalloproteinase             |
| hypothetical protein UF66_1428          | glyoxalase                                            | Universal stress protein family                   | 50S ribosomal protein L17    | 50S ribosomal protein L5  | D-alanine aminotransferase                     |
| hypothetical protein UF66_2233          | hydroxymethylglutaryl-CoA synthase                    | aconitate hydratase                               | 50S ribosomal protein L18    | 50S ribosomal protein L6  | DNA gyrase subunit A                           |

|                                                          |                                     |                                                                  |                              |                                                                      |                                                             |
|----------------------------------------------------------|-------------------------------------|------------------------------------------------------------------|------------------------------|----------------------------------------------------------------------|-------------------------------------------------------------|
| hypothetical protein<br>XA21_10855                       | hypothetical protein<br>(plasmid)   | adenylate kinase                                                 | 50S ribosomal<br>protein L19 | 8-amino-7-<br>oxononanoate<br>synthase                               | DNA polymerase X<br>family                                  |
| hypothetical protein<br>XA21_11705                       | hypothetical protein<br>A4A82_06020 | alanine racemase                                                 | 50S ribosomal<br>protein L21 | ATP-dependent Clp<br>protease proteolytic<br>subunit                 | DNA<br>starvation/stationary<br>phase protection<br>protein |
| hypothetical protein<br>XA22_02880                       | hypothetical protein<br>A4A82_10410 | aldehyde<br>dehydrogenase                                        | 50S ribosomal<br>protein L22 | ATP-dependent Zn<br>metallopeptidase<br>CDP-                         | DNA-binding protein                                         |
| hypothetical protein<br>XA22_11305                       | hypothetical protein<br>A4A82_12170 | alpha/beta hydrolase                                             | 50S ribosomal<br>protein L23 | glycerol:poly(glycero<br>phosphate)<br>glycerophosphotransf<br>erase | DNA-binding<br>response regulator                           |
| intracellular protease<br>amidase                        | hypothetical protein<br>AXY36_00580 | aminoacyltransferase                                             | 50S ribosomal<br>protein L24 | CTP synthetase                                                       | DNA-directed RNA<br>polymerase subunit<br>alpha             |
| MarR family<br>transcriptional<br>regulator              | hypothetical protein<br>AXY36_07260 | bacillithiol<br>biosynthesis cysteine-<br>adding enzyme BshC     | 50S ribosomal<br>protein L29 | Cell division protein<br>FtsK                                        | DNA-directed RNA<br>polymerase subunit<br>beta              |
| monooxygenase                                            | hypothetical protein<br>AXY36_09795 | ornithine<br>acetyltransferase/N-<br>acetylglutamate<br>synthase | 50S ribosomal<br>protein L3  | D-alanine<br>aminotransferase                                        | DNA-directed RNA<br>polymerase subunit<br>beta'             |
| multidrug transporter                                    | hypothetical protein<br>BSF33_00215 | catabolite control<br>protein A                                  | 50S ribosomal<br>protein L4  | D-ribose transporter<br>subunit RbsB                                 | F0F1 ATP synthase<br>subunit beta                           |
| Nif3-like dinuclear<br>metal center<br>hexameric protein | hypothetical protein<br>BSF33_10120 | cell division protein<br>FtsZ                                    | 50S ribosomal<br>protein L5  | DNA helicase                                                         | FMN reductase<br>(NADPH)                                    |

|                                               |                                       |                                   |                                                               |                                             |                                       |
|-----------------------------------------------|---------------------------------------|-----------------------------------|---------------------------------------------------------------|---------------------------------------------|---------------------------------------|
| non-canonical purine NTP pyrophosphatase      | hypothetical protein BZ166_05325      | cell division protein GpsB        | 50S ribosomal protein L6                                      | DNA methyltransferase                       | Fe-S cluster assembly protein SufD    |
| peptide chain release factor 2                | inosine-5-monophosphate dehydrogenase | dephospho-CoA kinase              | 50S ribosomal protein L7/L12                                  | DNA polymerase X family                     | GTPase ObgE                           |
| phosphopantothienoyl cysteine decarboxylase   | malate dehydrogenase (acceptor)       | dihydroxy-acid dehydratase        | ABC transporter ATP-binding protein                           | DNA-directed RNA polymerase subunit alpha   | LysR family transcriptional regulator |
| phosphopentomutase                            | methyltransferase                     | enoyl-ACP reductase               | ABC transporter, ATP-binding protein                          | DNA-directed RNA polymerase subunit beta    | NAD(P)H-dependent oxidoreductase      |
| pyruvate decarboxylase                        | mobilization protein C (plasmid)      | esterase                          | ATP synthase F0F1 subunit gamma                               | DNA-directed RNA polymerase subunit beta'   | NADH dehydrogenase                    |
| recombination/mobilization protein (plasmid)  | octanoyltransferase                   | ferritin                          | ATP-dependent DNA helicase                                    | Domain of uncharacterised function (DUF334) | PTS glucose transporter subunit IIA   |
| restriction endonuclease subunit S            | peptidylprolyl isomerase              | fructose-bisphosphate aldolase    | CDP-glycerol:poly(glycerophosphate) glycerophosphotransferase | Fe-S cluster assembly ATPase SufC           | Phosphate acetyltransferase           |
| RNA-binding transcriptional accessory protein | proline dehydrogenase                 | gamma-aminobutyrate permease      | CtsR family transcriptional regulator                         | Fe-S cluster assembly protein SufB          | RecX family transcriptional regulator |
| Serine protease                               | pyridoxamine 5-phosphate oxidase      | glucosamine-6-phosphate isomerase | D-alanine aminotransferase                                    | Fe-S cluster assembly protein SufD          | Serine protease                       |

|                                                       |                                                                         |                                                        |                                                      |                                                   |                                                   |
|-------------------------------------------------------|-------------------------------------------------------------------------|--------------------------------------------------------|------------------------------------------------------|---------------------------------------------------|---------------------------------------------------|
| Short-chain dehydrogenase/reductase SDR               | pyruvate decarboxylase                                                  | glucose-6-phosphate isomerase                          | D-alanyl-lipoteichoic acid biosynthesis protein DltD | GTP-binding protein TypA                          | Translation elongation factor Ts                  |
| sucrose-6-phosphate hydrolase                         | pyruvate dehydrogenase (acetyl-transferring) E1 component subunit alpha | glutamine-hydrolyzing GMP synthase                     | DNA gyrase subunit A                                 | Phosphate acetyltransferase                       | UDP-N-acetyl-D-galactosamine dehydrogenase        |
| sulfate adenylyltransferase                           | pyruvate kinase                                                         | glutamyl-tRNA amidotransferase                         | DNA primase                                          | RecX family transcriptional regulator             | UDP-N-acetylglucosamine 1-carboxyvinyltransferase |
| sulfite reductase                                     | recombinase A                                                           | glutamyl-tRNA reductase                                | DNA-binding protein                                  | UDP-N-acetyl-D-galactosamine dehydrogenase        | UDP-glucose 4-epimerase                           |
| tail protein                                          | recombination/mobilization protein (plasmid)                            | glutamyl-tRNA synthetase                               | DNA-damage repair protein                            | UDP-N-acetylglucosamine 1-carboxyvinyltransferase | acetate kinase                                    |
| transporter                                           | restriction endonuclease                                                | glycerol dehydrogenase                                 | DNA-directed RNA polymerase subunit beta             | Urease beta subunit                               | aconitate hydratase                               |
| transporter associated domain protein                 | ribulose-phosphate 3-epimerase                                          | glycerol-3-phosphate cytidylyltransferase              | Fe-S cluster assembly ATPase SufC                    | adenylate kinase                                  | acyl carrier protein                              |
| tRNA (adenosine(37)-N6)-dimethylallyltransferase MiaA | short-chain dehydrogenase                                               | hydroxymethylpyrimidine/phosphomethylpyrimidine kinase | GTP cyclohydrolase FolE2                             | adenylosuccinate synthase                         | alkaline shock protein 23                         |
| urease subunit gamma                                  | short-chain fatty acids transporter                                     | hypothetical protein A4A82_03560                       | GTPase ObgE                                          | aldo keto reductase                               | aminoacyltransferase                              |

|                                    |                                                          |                                  |                                                      |                                                   |                                                         |
|------------------------------------|----------------------------------------------------------|----------------------------------|------------------------------------------------------|---------------------------------------------------|---------------------------------------------------------|
| uroporphyrin-III methyltransferase | stage V sporulation protein G                            | hypothetical protein A4A82_06020 | Holliday junction resolvase RecU                     | aminoacyltransferase                              | anti-anti-sigma factor                                  |
|                                    | succinyl-CoA:3-ketoacid-coenzyme A transferase subunit B | hypothetical protein A4A82_08725 | NADH dehydrogenase                                   | aminopeptidase                                    | aspartyl/glutamyl-tRNA amidotransferase subunit A       |
|                                    | transaldolase                                            | hypothetical protein A4A82_09265 | NADH-dependent flavin oxidoreductase                 | anti-anti-sigma factor                            | beta-ketoacyl-[acyl-carrier-protein] synthase II        |
|                                    | transcription termination/antitermination protein NusG   | hypothetical protein A4A82_11275 | Na <sup>+</sup> /H <sup>+</sup> antiporter subunit D | anti-sigma B factor RsbW                          | branched-chain alpha-keto acid dehydrogenase subunit E2 |
|                                    | transcriptional repressor CodY                           | hypothetical protein A4A82_12595 | PTS glucose transporter subunit IIA                  | aspartate alpha-decarboxylase                     | cell division protein FtsZ                              |
|                                    | transketolase                                            | hypothetical protein AXY36_01150 | PTS mannose transporter subunit IIA                  | aspartate--tRNA ligase                            | cell division protein GpsB                              |
|                                    | transposon DNA-invertase                                 | hypothetical protein AXY36_06780 | Putative cytosolic protein                           | aspartyl/glutamyl-tRNA amidotransferase subunit A | citrate synthase                                        |
|                                    | triose-phosphate isomerase                               | hypothetical protein AXY36_09715 | RNA degradosome polyphosphate kinase                 | beta-ketoacyl-ACP reductase                       | cysteine synthase                                       |
|                                    | type I glyceraldehyde-3-phosphate dehydrogenase          | hypothetical protein BSF33_00215 | RepU (plasmid)                                       | carbamate kinase                                  | dihydrolipoyl dehydrogenase                             |

|                               |                                                |                                                                                       |                                |                                         |
|-------------------------------|------------------------------------------------|---------------------------------------------------------------------------------------|--------------------------------|-----------------------------------------|
| ureidoglycolate dehydrogenase | hypothetical protein BSF33_00755               | Repressor CsoR of the copZA operon                                                    | cell division protein FtsZ     | dihydroxyacetone kinase subunit L       |
| virulence factor              | hypothetical protein BSF33_08575               | Ribonuclease III family protein                                                       | cysteine desulfurase           | elongation factor G                     |
|                               | hypothetical protein RES9_02285                | Rrf2 family transcriptional regulator                                                 | cysteine--tRNA ligase          | elongation factor P                     |
|                               | hypothetical protein UF66_2233                 | TIGR01440 family protein                                                              | cytidine deaminase             | elongation factor Ts                    |
|                               | hypothetical protein XA21_07930                | Type I restriction-modification system, DNA-methyltransferase subunit M               | dephospho-CoA kinase           | elongation factor Tu                    |
|                               | hypothetical protein XA22_10040                | UDP-N-acetylglucosamine 1-carboxyvinyltransferase                                     | elongation factor P            | enolase                                 |
|                               | inosine-5-monophosphate dehydrogenase          | UDP-N-acetylmuramoylalanyl-D-glutamyl-2, 6-diaminopimelate--D-alanyl-D-alanine ligase | enoyl-ACP reductase            | enoyl-ACP reductase                     |
|                               | inositol monophosphatase                       | UDP-glucose 4-epimerase                                                               | excinuclease ABC subunit A     | formate dehydrogenase accessory protein |
|                               | iron ABC transporter substrate-binding protein | UTP-glucose-1-phosphate uridylyltransferase                                           | fructose-bisphosphate aldolase | fructose-bisphosphate aldolase          |

|                                                     |                                             |                                                        |                                                  |
|-----------------------------------------------------|---------------------------------------------|--------------------------------------------------------|--------------------------------------------------|
| isoprenyl transferase                               | Urease beta subunit                         | glucose-6-phosphate isomerase                          | general stress protein                           |
| malate dehydrogenase (acceptor)                     | [acyl-carrier-protein] S-malonyltransferase | glutamine-hydrolyzing GMP synthase                     | glucose-6-phosphate isomerase                    |
| manganese ABC transporter substrate-binding protein | acetyl-CoA acetyltransferase                | glutamyl-tRNA amidotransferase                         | glutamine--fructose-6-phosphate aminotransferase |
| metal-dependent hydrolase                           | acetyltransferase                           | glyceraldehyde-3-phosphate dehydrogenase, partial      | glutamyl-tRNA amidotransferase                   |
| molecular chaperone GrpE                            | addiction module antitoxin RelB             | glycerol-3-phosphate dehydrogenase                     | glutamyl-tRNA synthetase                         |
| multidrug ABC transporter ATP-binding protein       | adenylate kinase                            | glyoxalase                                             | glycerol-3-phosphate cytidyltransferase          |
| nitrate reductase                                   | alanine--tRNA ligase                        | heptaprenyl pyrophosphate synthase subunit A           | glycerol-3-phosphate dehydrogenase               |
| peptidase                                           | aldo/keto reductase                         | histidine--tRNA ligase                                 | glycine C-acetyltransferase                      |
| peptidase M23                                       | alkaline shock protein 23                   | hydroxymethylglutaryl-CoA synthase                     | glycine--tRNA ligase                             |
| peptidase M24                                       | aminopeptidase                              | hydroxymethylpyrimidine/phosphomethylpyrimidine kinase | histidine ammonia-lyase                          |
| phage protein                                       | anti-anti-sigma factor                      | hypothetical protein A4A82_03560                       | histidine kinase                                 |

200 mg L-1

|                                     |                                                                                                           |                                  |                                                        |
|-------------------------------------|-----------------------------------------------------------------------------------------------------------|----------------------------------|--------------------------------------------------------|
| phosphoglucosamine mutase           | anti-sigma B factor RsbW                                                                                  | hypothetical protein A4A82_03720 | hydroxymethylglutaryl-CoA synthase                     |
| putative transmembrane protein      | antitermination protein NusB                                                                              | hypothetical protein A4A82_09265 | hydroxymethylpyrimidine/phosphomethylpyrimidine kinase |
| putative transporter                | arginine--tRNA ligase                                                                                     | hypothetical protein A4A82_10890 | hypothetical protein A4A82_01085                       |
| pyridoxamine 5-phosphate oxidase    | aspartate alpha-decarboxylase                                                                             | hypothetical protein AXY36_00580 | hypothetical protein A4A82_02240                       |
| recombinase RecA                    | aspartate--tRNA ligase                                                                                    | hypothetical protein AXY36_01150 | hypothetical protein A4A82_03560                       |
| recombinase RecB                    | bifunctional 5,10-methylene-tetrahydrofolate dehydrogenase/5,10-methylene-tetrahydrofolate cyclohydrolase | hypothetical protein AXY36_02580 | hypothetical protein A4A82_04210                       |
| serine/threonine protein kinase     | branched-chain alpha-keto acid dehydrogenase subunit E2                                                   | hypothetical protein AXY36_02715 | hypothetical protein A4A82_06020                       |
| short-chain dehydrogenase           | capsule biosynthesis protein CapA                                                                         | hypothetical protein AXY36_05930 | hypothetical protein A4A82_07220                       |
| single-stranded DNA-binding protein | cell division protein DivIVA                                                                              | hypothetical protein AXY36_07260 | hypothetical protein A4A82_08725                       |
| stage V sporulation protein G       | cell-cycle regulation protein HIT                                                                         | hypothetical protein AXY36_09715 | hypothetical protein A4A82_09265                       |
| teichoic acid biosynthesis protein  | citrate synthase                                                                                          | hypothetical protein AXY36_09795 | hypothetical protein A4A82_11275                       |

|                                                               |                                              |                                                          |                                                            |
|---------------------------------------------------------------|----------------------------------------------|----------------------------------------------------------|------------------------------------------------------------|
| thiol reductase<br>thioredoxin                                | class I fructose-<br>biphosphate<br>aldolase | hypothetical protein<br>BSF33_00215                      | hypothetical protein<br>AXY36_01150                        |
| thioredoxin                                                   | class II fumarate<br>hydratase               | hypothetical protein<br>BSF33_00540                      | hypothetical protein<br>AXY36_06600                        |
| transcription<br>termination/antitermi<br>nation protein NusG | co-chaperone GroES                           | hypothetical protein<br>BSF33_04620                      | hypothetical protein<br>BSF33_04470                        |
| transcriptional<br>repressor CcpN                             | cold-shock protein                           | hypothetical protein<br>BSF33_05765                      | hypothetical protein<br>BSF33_08575                        |
| transposon DNA-<br>invertase                                  | cysteine synthase                            | hypothetical protein<br>BSF33_13140                      | hypothetical protein<br>BSF33_11000                        |
| trigger factor                                                | cysteine--tRNA<br>ligase                     | hypothetical protein<br>RES9_02285                       | hypoxanthine<br>phosphoribosyltransf<br>erase              |
| universal stress<br>protein                                   | dihydrofolate<br>reductase                   | hypothetical protein<br>XA22_13145                       | inosine-5-<br>monophosphate<br>dehydrogenase               |
| uridylate kinase                                              | dihydrolipoamide<br>succinyltransferase      | hypoxanthine<br>phosphoribosyltransf<br>erase            | lipase                                                     |
| virulence factor                                              | elongation factor G                          | imidazole glycerol<br>phosphate synthase<br>subunit HisH | malate:quinone<br>oxidoreductase                           |
|                                                               | elongation factor P                          | lipid hydroperoxide<br>peroxidase                        | malonyl CoA-acyl<br>carrier protein<br>transacylase        |
|                                                               | elongation factor Tu                         | membrane protein                                         | manganese ABC<br>transporter substrate-<br>binding protein |

|                                              |                                                                     |                                                |
|----------------------------------------------|---------------------------------------------------------------------|------------------------------------------------|
| fructose-bisphosphate aldolase               | metal-dependent hydrolase                                           | molecular chaperone DnaK                       |
| glucose-6-phosphate isomerase                | molecular chaperone DnaK                                            | multidrug ABC transporter ATP-binding protein  |
| glycine C-acetyltransferase                  | ornithine--oxo-acid transaminase                                    | nucleoside-diphosphate kinase                  |
| glycine--tRNA ligase                         | peptidase                                                           | oligoribonuclease                              |
| heptaprenyl pyrophosphate synthase subunit A | peptidase M28                                                       | peptidase                                      |
| histidine--tRNA ligase                       | phosphogluconate dehydrogenase (NADP(+)-dependent, decarboxylating) | permease                                       |
| histidinol-phosphate aminotransferase        | phosphoribosylformylglycinamidine synthase II                       | peroxiredoxin                                  |
| hypothetical protein A4A82_02240             | phosphotransacetylase                                               | phosphoenolpyruvate-protein phosphotransferase |
| hypothetical protein A4A82_04790             | putative N-carbamoyl-beta-alanine amidohydrolase                    | phosphoglycerate kinase                        |
| hypothetical protein A4A82_05255             | putative transporter                                                | phosphopantothenoyl cysteine decarboxylase     |

|                                     |                                             |                                                                                     |
|-------------------------------------|---------------------------------------------|-------------------------------------------------------------------------------------|
| hypothetical protein<br>A4A82_06335 | pyruvate, phosphate<br>dikinase             | phosphopyruvate<br>hydratase                                                        |
| hypothetical protein<br>A4A82_07220 | quinone<br>oxidoreductase                   | putative<br>phage/plasmid<br>primase                                                |
| hypothetical protein<br>A4A82_08725 | reactive<br>intermediate/imine<br>deaminase | putative transporter                                                                |
| hypothetical protein<br>A4A82_08945 | redox-regulated<br>ATPase YchF              | pyridoxamine 5-<br>phosphate oxidase                                                |
| hypothetical protein<br>A4A82_09030 | ribosomal protein<br>L7Ae                   | pyruvate<br>decarboxylase                                                           |
| hypothetical protein<br>A4A82_09265 | ribosome recycling<br>factor                | pyruvate<br>dehydrogenase<br>(acetyl-transferring)<br>E1 component<br>subunit alpha |
| hypothetical protein<br>A4A82_10890 | ribulose-phosphate 3-<br>epimerase          | pyruvate kinase                                                                     |
| hypothetical protein<br>AXY36_00580 | scaffolding protein                         | pyruvate oxidase                                                                    |
| hypothetical protein<br>AXY36_01585 | sodium-independent<br>anion transporter     | recombinase A                                                                       |
| hypothetical protein<br>AXY36_02415 | stage V sporulation<br>protein G            | recombinase RecA                                                                    |
| hypothetical protein<br>AXY36_02580 | thioredoxin-disulfide<br>reductase          | recombinase RecB                                                                    |
| hypothetical protein<br>AXY36_06600 | threonine synthase                          | recombination/mobili<br>zation protein<br>(plasmid)                                 |

|                                     |                                                               |                                                                    |
|-------------------------------------|---------------------------------------------------------------|--------------------------------------------------------------------|
| hypothetical protein<br>AXY36_07245 | transaldolase                                                 | redox-regulated<br>ATPase YchF                                     |
| hypothetical protein<br>AXY36_09935 | transcription<br>termination/antitermi<br>nation protein NusA | ribose-phosphate<br>pyrophosphokinase                              |
| hypothetical protein<br>BSF33_04620 | transketolase                                                 | ribosome recycling<br>factor                                       |
| hypothetical protein<br>BSF33_04630 | translation initiation<br>factor IF-1                         | serine/threonine<br>protein kinase                                 |
| hypothetical protein<br>BSF33_05765 | transposase                                                   | single-stranded DNA-<br>binding protein                            |
| hypothetical protein<br>RES10_10450 | trigger factor                                                | sodium-independent<br>anion transporter                            |
| hypothetical protein<br>RES11_04470 | type I glyceraldehyde-<br>3-phosphate<br>dehydrogenase        | succinate<br>dehydrogenase<br>flavoprotein subunit                 |
| hypothetical protein<br>RES11_09065 | uridylate kinase                                              | succinyl-CoA:3-<br>ketoacid-coenzyme<br>A transferase subunit<br>B |
| hypothetical protein<br>RES9_11625  |                                                               | teichoic acid<br>biosynthesis protein<br>F2                        |
| hypothetical protein<br>UF66_0089   |                                                               | thiol reductase<br>thioredoxin                                     |
| hypothetical protein<br>UF66_2291   |                                                               | transaldolase                                                      |
| hypothetical protein<br>XA21_08605  |                                                               | transcriptional<br>repressor CodY                                  |

hypothetical protein  
XA21\_11860  
hypothetical protein  
XA22\_07340  
inosine-5-  
monophosphate  
dehydrogenase  
lipase  
lipid hydroperoxide  
peroxidase  
malate  
dehydrogenase  
(acceptor)  
malate:quinone  
oxidoreductase  
manganese-  
dependent inorganic  
pyrophosphatase  
mannitol-1-  
phosphate 5-  
dehydrogenase  
metal-dependent  
hydrolase  
methionine sulfoxide  
reductase  
molecular chaperone  
DnaK  
molecular chaperone  
GrpE  
molecular chaperone  
Hsp33

transketolase  
translation initiation  
factor IF-1  
transposon DNA-  
invertase  
trigger factor  
triose-phosphate  
isomerase  
type I glutamate--  
ammonia ligase  
universal stress  
protein UspA  
uracil  
phosphoribosyltransf  
erase

monooxygenase  
o-succinylbenzoate  
synthase  
ornithine--oxo-acid  
aminotransferase  
peptidase M28  
permease  
phage tail protein  
phosphoenolpyruvate  
synthase regulatory  
protein  
phosphoglucosamine  
mutase  
phosphoglyceromuta  
se  
phosphotransacetylase  
polysaccharide  
biosynthesis protein  
preprotein  
translocase subunit  
YajC  
primosomal protein  
N'  
putative DNA-  
binding protein,  
YbaB family  
putative  
phage/plasmid  
primase

pyridoxamine 5-  
phosphate oxidase  
quinone  
oxidoreductase  
ribonuclease R  
ribonucleotide-  
diphosphate  
reductase subunit  
beta  
ribosomal RNA  
small subunit  
methyltransferase H  
ribosomal protein  
L7Ae  
ribosome biogenesis  
GTPase Der  
ribosome biogenesis  
GTPase YqeH  
ribosome recycling  
factor  
ribulose-phosphate 3-  
epimerase  
serine  
hydroxymethyltransf  
erase  
sigma-54 modulation  
protein  
signal recognition  
particle  
stage V sporulation  
protein G

succinate--CoA  
ligase subunit beta  
sulfurtransferase  
FdhD  
sulfite reductase  
subunit beta  
  
superoxide dismutase  
  
tRNA uridine(34) 5-  
carboxymethylamino  
methyl synthesis  
enzyme MnmG  
thioredoxin  
thymidylate kinase  
thymidylate synthase  
transaldolase  
transcriptional  
repressor CodY  
transketolase  
translation initiation  
factor IF-1  
translation initiation  
factor IF-2  
translation initiation  
factor IF-3  
transposon DNA-  
invertase  
trigger factor  
two-component  
response regulator,  
LytR

|  |                                                                                                                                                                                                                                                        |                                                                                                                                                                                  |                                                                                                                                                                           |                                                                                                                                                                                                                                                          |                                                                                                                                                                                    |                                                                                                                                                                                                 |
|--|--------------------------------------------------------------------------------------------------------------------------------------------------------------------------------------------------------------------------------------------------------|----------------------------------------------------------------------------------------------------------------------------------------------------------------------------------|---------------------------------------------------------------------------------------------------------------------------------------------------------------------------|----------------------------------------------------------------------------------------------------------------------------------------------------------------------------------------------------------------------------------------------------------|------------------------------------------------------------------------------------------------------------------------------------------------------------------------------------|-------------------------------------------------------------------------------------------------------------------------------------------------------------------------------------------------|
|  |                                                                                                                                                                                                                                                        |                                                                                                                                                                                  |                                                                                                                                                                           | type I glutamate--<br>ammonia ligase<br><br>type I glyceraldehyde-<br>3-phosphate<br>dehydrogenase<br><br>universal stress<br>protein UspA<br>uracil<br>phosphoribosyltransf<br>erase<br>urease subunit alpha<br>uridylate kinase<br>valine--tRNA ligase |                                                                                                                                                                                    |                                                                                                                                                                                                 |
|  | 1,4-dihydroxy-2-<br>naphthoyl-CoA<br>synthase<br><br>2,3-<br>bisphosphoglycerate-<br>independent<br>phosphoglycerate<br>mutase<br><br>2,4-dienoyl-CoA<br>reductase<br><br>2-deoxyribose-5-<br>phosphate aldolase<br>2-oxoglutarate<br>dehydrogenase E1 | 2-oxoglutarate<br>ferredoxin<br>oxidoreductase<br>subunit alpha<br><br>CTP synthetase<br><br>alpha/beta hydrolase<br><br>dephospho-CoA<br>kinase<br>metal-dependent<br>hydrolase | histidine ammonia-<br>lyase<br><br>hypothetical protein<br>A4A82_08960<br><br>hypothetical protein<br>AXY36_09720<br><br>ribonuclease HII<br>ring-cleaving<br>dioxygenase | 3-ketoacyl-CoA<br>thiolase<br><br>CoA-transferase<br><br>DNA repair protein<br><br>F0F1 ATP synthase<br>subunit C<br>FAD-dependent<br>oxidoreductase                                                                                                     | GTP<br>pyrophosphokinase<br><br>alpha/beta hydrolase<br><br>ornithine<br>acetyltransferase/N-<br>acetylglutamate<br>synthase<br>hypothetical protein<br>XA21_11670<br>parM protein | 2-dehydro-3-<br>deoxyphosphoglucon<br>ate aldolase<br><br>DNA primase<br><br>Rrf2 family<br>transcriptional<br>regulator<br><br>cobalt ABC<br>transporter ATPase<br>lipoate-protein ligase<br>A |

|                                                        |                        |                          |                                                           |                                                          |
|--------------------------------------------------------|------------------------|--------------------------|-----------------------------------------------------------|----------------------------------------------------------|
| 2-oxoglutarate ferredoxin oxidoreductase subunit alpha | peptidase              | sodium:proton antiporter | Fis family transcriptional regulator                      | putative transcriptional regulator (plasmid)             |
| 23S rRNA (uracil-5-)-methyltransferase RumA            | recombinase RecB       | sulfate permease         | GTP-binding protein TypA                                  | spermidine/putrescine ABC transporter permease           |
| 3-hexulose-6-phosphate synthase                        | scaffolding protein    |                          | Homoserine dehydrogenase                                  | succinyl-CoA:3-ketoacid-coenzyme A transferase subunit B |
| 3-methyl-2-oxobutanoate hydroxymethyltransferase       | tRNA methyltransferase |                          | L-lactate dehydrogenase                                   | sulfate permease                                         |
| 3-oxoacyl-[acyl-carrier protein] reductase             |                        |                          | L-serine dehydratase, iron-sulfur-dependent subunit alpha |                                                          |
| 30S ribosomal protein S1                               |                        |                          | Major myo-inositol transporter IolT                       |                                                          |
| 30S ribosomal protein S11                              |                        |                          | MobA/MobL family protein                                  |                                                          |
| 30S ribosomal protein S15                              |                        |                          | PTS beta-glucoside transporter subunit IIBC               |                                                          |
| 30S ribosomal protein S19                              |                        |                          | RNA helicase                                              |                                                          |
| 30S ribosomal protein S2                               |                        |                          | RND transporter                                           |                                                          |

|                                      |                                                             |
|--------------------------------------|-------------------------------------------------------------|
| 30S ribosomal<br>protein S3          | acyl-CoA<br>dehydrogenase                                   |
| 30S ribosomal<br>protein S5          | aldehyde<br>dehydrogenase<br>family protein<br>bifunctional |
| 30S ribosomal<br>protein S6          | riboflavin<br>kinase/FMN<br>adenylyltransferase             |
| 30S ribosomal<br>protein S7          | damage-inducible<br>protein DinB                            |
| 5'(3')-<br>deoxyribonucleotidas<br>e | formate<br>dehydrogenase                                    |
| 50S ribosomal<br>protein L1          | glutamate synthase                                          |
| 50S ribosomal<br>protein L10         | glycerophosphodiester<br>phosphodiesterase                  |
| 50S ribosomal<br>protein L14         | heme ABC<br>transporter ATP-<br>binding protein             |
| 50S ribosomal<br>protein L15         | hypothetical protein<br>(plasmid)                           |
| 50S ribosomal<br>protein L19         | hypothetical protein<br>BSF33_09115                         |
| 50S ribosomal<br>protein L22         | hypothetical protein<br>RES9_02800                          |
| 50S ribosomal<br>protein L24         | hypothetical protein<br>XA22_13430                          |

50S ribosomal  
protein L25

50S ribosomal  
protein L29

50S ribosomal  
protein L30

50S ribosomal  
protein L6

50S ribosomal  
protein L7/L12

6-phosphogluconate  
dehydrogenase

8-amino-7-  
oxononanoate  
synthase

ABC transporter  
(plasmid)

ABC transporter  
ATP-binding protein  
ATP synthase F0F1  
subunit B

ATP synthase F0F1  
subunit alpha

ATP synthase F0F1  
subunit delta

lactonase

nitric oxide reductase  
activation protein  
NorQ

peptidase M24

peptide chain release  
factor 3

phenylalanine--tRNA  
ligase subunit beta

phosphoenolpyruvate  
carboxykinase [ATP]

phosphoglycerate  
dehydrogenase

phosphopyruvate  
hydratase

serine protease SplE

site-specific integrase

sporulation regulator  
WhiA

teichoic acid  
biosynthesis protein  
B

ATP-dependent Clp  
protease proteolytic  
subunit  
ATP-dependent  
DNA helicase  
ATP-dependent Zn  
metallopeptidase  
ArsR family  
transcriptional  
regulator  
CDP-glycerol--  
poly(glycerophosphat  
e)  
glycerophosphotransf  
erase  
CDP-  
glycerol:poly(glycero  
phosphate)  
glycerophosphotransf  
erase  
CoA-transferase  
D-alanine  
aminotransferase  
D-alanine--D-alanine  
ligase  
DNA gyrase subunit  
A  
DNA helicase  
DNA polymerase III  
subunit beta

thiamine-phosphate  
pyrophosphorylase

transposase B

transcription  
termination factor  
Rho

type I methionyl  
aminopeptidase

DNA-binding protein

DNA-directed RNA  
polymerase subunit  
beta

F0F1 ATP synthase  
subunit beta

F0F1 ATP synthase  
subunit epsilon

FAD-dependent  
oxidoreductase

Fe-S cluster  
assembly protein

SufB

Fis family  
transcriptional  
regulator

GTP cyclohydrolase

FolE2

GTP-binding protein

TypA

GTPase ObgE

IMP dehydrogenase

L-proline 3-  
hydroxylase

Mobile element  
protein

Molybdenum  
cofactor biosynthesis  
protein A

NAD-dependent  
dehydratase  
NADH  
dehydrogenase  
NADP-dependent  
oxidoreductase  
NIF3 protein  
Oligoendopeptidase  
F  
Oligopeptide ABC  
transporter,  
periplasmic  
oligopeptide-binding  
protein OppA  
PTS glucose  
transporter subunit  
IIA  
PTS mannose  
transporter subunit  
IIA  
PadR family  
transcriptional  
regulator  
Phage lysin, N-  
acetylmuramoyl-L-  
alanine amidase  
Phosphate  
acetyltransferase  
Replication-  
associated protein

ThiJ/PfpI family  
protein  
Translation  
elongation factor Ts  
UDP-N-acetyl-D-  
galactosamine  
dehydrogenase  
UDP-N-  
acetylmuramate--  
alanine ligase  
UDP-N-  
acetylmuramoylalany  
l-D-glutamyl-2, 6-  
diaminopimelate--D-  
alanyl-D-alanine  
ligase  
UDP-glucose 4-  
epimerase  
Uncharacterised  
protein  
Urease beta subunit  
YigZ family protein  
[acyl-carrier-protein]  
S-malonyltransferase  
  
acetate kinase  
acetyl-CoA  
carboxylase biotin  
carboxylase subunit  
aconitate hydratase  
acyl carrier protein

acyl-CoA  
dehydrogenase  
adenylate kinase  
adenylosuccinate  
synthase  
alanine  
dehydrogenase  
  
alanine--tRNA ligase  
  
alcohol  
dehydrogenase  
aldehyde  
dehydrogenase  
aldo/keto reductase  
alkaline shock  
protein 23  
aminopeptidase  
anthranilate synthase  
component I  
  
anti-anti-sigma factor  
  
arginine repressor  
arsenate reductase  
aspartate alpha-  
decarboxylase  
aspartyl/glutamyl-  
tRNA  
amidotransferase  
subunit A  
beta-ketoacyl-ACP  
reductase

beta-ketoacyl-[acyl-  
carrier-protein]  
synthase II  
branched-chain alpha-  
keto acid  
dehydrogenase E1  
branched-chain alpha-  
keto acid  
dehydrogenase  
subunit E2  
cadmium resistance  
protein  
cell division protein  
DivIVA  
cell division protein  
FtsA  
cell division protein  
FtsZ  
cell division protein  
GpsB  
chorismate mutase  
citrate synthase  
cysteine desulfurase  
cysteine synthase  
cysteine--tRNA  
ligase  
cytochrome aa3  
quinol oxidase  
subunit II  
dehydrogenase  
deoxycytidine kinase

**300 mg L-1**

dephospho-CoA  
kinase  
diaminopimelate  
decarboxylase  
dihydrolipoamide  
succinyltransferase  
dihydrolipoyl  
dehydrogenase  
dihydroxy-acid  
dehydratase  
dihydroxyacetone  
kinase subunit L  
elongation factor G  
elongation factor P  
elongation factor Tu  
endopeptidase Clp  
ATP-binding subunit  
C  
enolase  
  
enoyl-ACP reductase  
  
excinuclease ABC  
subunit A  
excinuclease ABC  
subunit B  
exported protein  
ferrichrome ABC  
transporter substrate-  
binding protein  
ferritin

formate--  
tetrahydrofolate  
ligase  
fructose-  
biphosphate  
aldolase  
general stress protein  
  
glucosamine-6-  
phosphate isomerase  
  
glucose-6-phosphate  
isomerase  
  
glutamate  
dehydrogenase  
glutamate synthase  
glutamate-1-  
semialdehyde  
aminotransferase  
glutamine--fructose-  
6-phosphate  
aminotransferase  
glutamine-  
hydrolyzing GMP  
synthase  
  
glycerol-3-phosphate  
cytidyltransferase  
  
glycine C-  
acetyltransferase

glycine cleavage  
system protein T  
glycine  
dehydrogenase  
glycine  
dehydrogenase  
subunit 2  
  
glycine--tRNA ligase  
  
glycine/betaine ABC  
transporter permease  
  
heme-binding protein  
  
hsp90-like protein  
hydroxymethylglutar  
yl-CoA synthase  
hydroxymethylpyrimi  
dine/phosphomethylp  
yrimidine kinase  
hypothetical protein  
A4A82\_02240  
hypothetical protein  
A4A82\_03560  
hypothetical protein  
A4A82\_03720  
hypothetical protein  
A4A82\_03930  
hypothetical protein  
A4A82\_06020

hypothetical protein  
A4A82\_07220  
hypothetical protein  
A4A82\_08945  
hypothetical protein  
A4A82\_09030  
hypothetical protein  
A4A82\_12170  
hypothetical protein  
A4A82\_12600  
hypothetical protein  
AXY36\_02415  
hypothetical protein  
AXY36\_02580  
hypothetical protein  
AXY36\_03305  
hypothetical protein  
AXY36\_06600  
hypothetical protein  
AXY36\_06780  
hypothetical protein  
BSF33\_00215  
hypothetical protein  
BSF33\_00755  
hypothetical protein  
BSF33\_04620  
hypothetical protein  
BSF33\_05765  
hypothetical protein  
BSF33\_08575

hypothetical protein  
BSF33\_12980  
hypothetical protein  
BZ166\_05325  
hypothetical protein  
RES10\_10450  
hypothetical protein  
RES10\_11420  
hypothetical protein  
RES11\_04470  
hypothetical protein  
RES11\_09065  
hypothetical protein  
RES9\_02285  
hypothetical protein  
RES9\_11625  
hypothetical protein  
UF66\_1532  
hypothetical protein  
UF66\_2021  
hypothetical protein  
XA21\_11805  
hypothetical protein  
XA21\_11860  
hypothetical protein  
XA21\_13400  
hypothetical protein  
XA22\_10040  
hypoxanthine  
phosphoribosyltransf  
erase

iron ABC transporter  
substrate-binding  
protein  
isoleucine--tRNA  
ligase  
isoleucyl-tRNA  
synthetase, partial  
lactate  
dehydrogenase  
late competence  
protein ComEC  
leucyl  
aminopeptidase  
lipid hydroperoxide  
peroxidase  
lipoate--protein  
ligase  
long-chain fatty acid--  
CoA ligase  
malate  
dehydrogenase  
malate:quinone  
oxidoreductase  
manganese ABC  
transporter substrate-  
binding protein  
mannitol-1-  
phosphate 5-  
dehydrogenase  
metal-dependent  
hydrolase

methionine ABC  
transporter substrate-  
binding protein  
methionine sulfoxide  
reductase  
molecular chaperone  
DnaK  
molecular chaperone  
Hsp33  
nitronate  
monooxygenase  
nuclease SbcCD  
subunit C  
nucleoside-  
diphosphate kinase  
oligoribonuclease  
oxidoreductase  
peptidase  
peptidase M28  
phosphoenolpyruvate  
carboxykinase  
phosphoenolpyruvate  
synthase regulatory  
protein  
phosphoglycerate  
kinase  
phosphoglyceromuta  
se  
phosphonate ABC  
transporter ATP-  
binding protein

polynucleotide  
phosphorylase  
preprotein  
translocase subunit  
SecA  
protein rlx  
pseudouridine  
synthase  
putative DNA-  
binding protein,  
YbaB family  
putative alpha-  
acetolactate  
decarboxylase  
putative  
phage/plasmid  
primase  
pyrimidine-  
nucleoside  
phosphorylase  
pyruvate  
dehydrogenase  
(acetyl-transferring)  
E1 component  
subunit alpha  
pyruvate oxidase  
pyruvate, phosphate  
dikinase  
recombinase A  
recombinase RecB  
recombinase XerD

ribonuclease J  
ribose-phosphate  
pyrophosphokinase  
ribosomal protein  
L7Ae  
ribosome biogenesis  
GTPase Der  
ribosome recycling  
factor  
ribulose-phosphate 3-  
epimerase  
scaffolding protein  
serine  
hydroxymethyltransf  
erase  
short-chain  
dehydrogenase  
sigma-54 modulation  
protein  
signal recognition  
particle  
succinate  
dehydrogenase  
flavoprotein subunit  
succinate--CoA  
ligase subunit alpha  
succinate--CoA  
ligase subunit beta  
superoxide dismutase

teichoic acid  
biosynthesis protein  
thiol reductase  
thioredoxin  
thioredoxin  
thioredoxin-disulfide  
reductase  
thymidine  
phosphorylase  
thymidylate kinase  
transcription  
elongation factor  
GreA  
transcriptional  
repressor CodY  
transketolase  
translation initiation  
factor IF-2  
translation initiation  
factor IF-3  
transposase  
trigger factor  
two-component  
response regulator,  
LytR  
type I glutamate--  
ammonia ligase  
type I methionyl  
aminopeptidase  
universal stress  
protein UspA

|  |                                                                                                                      |                                     |                                                         |                                                            |                                                                   |                              |
|--|----------------------------------------------------------------------------------------------------------------------|-------------------------------------|---------------------------------------------------------|------------------------------------------------------------|-------------------------------------------------------------------|------------------------------|
|  | uracil<br>phosphoribosyltransf<br>erase<br>uridylate kinase<br>uroporphyrinogen<br>decarboxylase<br>virulence factor |                                     |                                                         |                                                            |                                                                   |                              |
|  | 50S ribosomal<br>protein L28                                                                                         | gamma-<br>aminobutyrate             | 50S ribosomal<br>protein L32                            | 30S ribosomal<br>protein S17                               | 50S ribosomal<br>protein L11                                      | 30S ribosomal<br>protein S17 |
|  | DNA polymerase III<br>subunit alpha                                                                                  | glucokinase                         | DNA polymerase III<br>subunit gamma/tau                 | 50S ribosomal<br>protein L11                               | 50S ribosomal<br>protein L23                                      | 30S ribosomal<br>protein S19 |
|  | alkyl hydroperoxide<br>reductase                                                                                     | hypothetical protein<br>BSF33_00540 | beta-ketoacyl-[acyl-<br>carrier-protein]<br>synthase II | 50S ribosomal<br>protein L14                               | 50S ribosomal<br>protein L30                                      | 30S ribosomal<br>protein S2  |
|  | esterase                                                                                                             | phosphotransacetylase               | class I fructose-<br>bisphosphate<br>aldolase           | 50S ribosomal<br>protein L30                               | 6-phosphogluconate<br>dehydrogenase                               | 50S ribosomal<br>protein L11 |
|  | multidrug ABC<br>transporter ATP-<br>binding protein                                                                 |                                     | formate<br>dehydrogenase<br>accessory protein           | 6-phosphogluconate<br>dehydrogenase                        | Glutamyl<br>endopeptidase<br>precursor, serine<br>proteinase SspA | 50S ribosomal<br>protein L14 |
|  | nitroreductase                                                                                                       |                                     |                                                         | ABC transporter<br>(plasmid)                               | NAD(P)-dependent<br>oxidoreductase                                | 50S ribosomal<br>protein L15 |
|  | peptidase M23                                                                                                        |                                     |                                                         | ATP-dependent Clp<br>protease ATP-<br>binding subunit ClpX | beta-ketoacyl-[acyl-<br>carrier-protein]<br>synthase II           | 50S ribosomal<br>protein L23 |

|                     |                                                                                                               |                                                                   |                                                      |                                                            |
|---------------------|---------------------------------------------------------------------------------------------------------------|-------------------------------------------------------------------|------------------------------------------------------|------------------------------------------------------------|
| 100 + 200 mg<br>L-1 | phosphogluconate<br>dehydrogenase<br>(NADP(+)-<br>dependent,<br>decarboxylating)<br>sulfurtransferase<br>FdhD | ATP-dependent Clp<br>protease proteolytic<br>subunit              | glucokinase                                          | 50S ribosomal<br>protein L3                                |
|                     |                                                                                                               | DNA<br>methyltransferase                                          | hsp90-like protein                                   | 50S ribosomal<br>protein L30                               |
|                     |                                                                                                               | DNA-directed RNA<br>polymerase subunit<br>alpha                   | multidrug ABC<br>transporter ATP-<br>binding protein | 50S ribosomal<br>protein L6                                |
|                     |                                                                                                               | Ferredoxin-<br>dependent glutamate<br>synthase                    | phosphoglucosamine<br>mutase                         | 6-phosphogluconate<br>dehydrogenase                        |
|                     |                                                                                                               | Glutamyl<br>endopeptidase<br>precursor, serine<br>proteinase SspA | polysaccharide<br>biosynthesis protein               | ATP-dependent Clp<br>protease ATP-<br>binding subunit ClpX |
|                     |                                                                                                               | N-acetyltransferase                                               | pyridoxamine 5-<br>phosphate oxidase                 | deoxyribose-<br>phosphate aldolase                         |
|                     |                                                                                                               | NAD(P)-dependent<br>oxidoreductase                                | recombinase RecA                                     | hypothetical protein<br>RES9_02285                         |
|                     |                                                                                                               | cell division protein<br>FtsA                                     | transcription<br>elongation factor<br>GreA           | lipid hydroperoxide<br>peroxidase                          |
|                     |                                                                                                               | deoxyribose-<br>phosphate aldolase                                |                                                      | malate<br>dehydrogenase<br>(acceptor)                      |
|                     |                                                                                                               | glucokinase                                                       |                                                      | phosphoglucosamine<br>mutase                               |
|                     |                                                                                                               | hypothetical protein<br>A4A82_12595                               |                                                      | prephenate<br>dehydrogenase                                |

|  |                                                |                                               |                                       |                                                                                                                                                                      |                                               |                                                                            |
|--|------------------------------------------------|-----------------------------------------------|---------------------------------------|----------------------------------------------------------------------------------------------------------------------------------------------------------------------|-----------------------------------------------|----------------------------------------------------------------------------|
|  |                                                |                                               |                                       | hypothetical protein<br>AXY36_08620                                                                                                                                  |                                               | type I glyceraldehyde-<br>3-phosphate<br>dehydrogenase                     |
|  |                                                |                                               |                                       | methionine--tRNA<br>ligase<br>putative transporter<br>teichoic acid<br>biosynthesis protein<br>transcription<br>elongation factor<br>GreA<br>urease subunit<br>gamma |                                               |                                                                            |
|  | 1-pyrroline-5-<br>carboxylate<br>dehydrogenase | 1,4-dihydroxy-2-<br>naphthoyl-CoA<br>synthase | DNA primase                           | 30S ribosomal<br>protein S20                                                                                                                                         | 1,4-dihydroxy-2-<br>naphthoyl-CoA<br>synthase | 30S ribosomal<br>protein S6                                                |
|  | 2-oxoisovalerate<br>dehydrogenase              | 5'(3')-<br>deoxyribonucleotidas<br>e          | hypothetical protein<br>RES9_02800    | 50S ribosomal<br>protein L25                                                                                                                                         | acyl carrier protein                          | 5'-<br>methylthioadenosine/<br>S-<br>adenosylhomocystein<br>e nucleosidase |
|  | 3-hydroxyacyl-CoA<br>dehydrogenase             | Oligoendopeptidase<br>F                       | translation initiation<br>factor IF-1 | acetate--CoA ligase                                                                                                                                                  | hypothetical protein<br>A4A82_08725           | 50S ribosomal<br>protein L21                                               |
|  | 30S ribosomal<br>protein S10                   | acetate kinase                                |                                       | acyl carrier protein                                                                                                                                                 |                                               | 50S ribosomal<br>protein L29                                               |
|  | 30S ribosomal<br>protein S16                   | aldehyde<br>dehydrogenase                     |                                       | adenylosuccinate<br>synthase                                                                                                                                         |                                               | 50S ribosomal<br>protein L31                                               |
|  | 30S ribosomal<br>protein S17                   | aminoacyltransferase                          |                                       | aldehyde<br>dehydrogenase                                                                                                                                            |                                               | 50S ribosomal<br>protein L36                                               |

|                                                     |                                                |                                                       |                      |
|-----------------------------------------------------|------------------------------------------------|-------------------------------------------------------|----------------------|
| 30S ribosomal protein S18                           | aminopeptidase                                 | arsenate reductase                                    | cold-shock protein   |
| 30S ribosomal protein S9                            | enoyl-ACP reductase                            | aspartate aminotransferase                            | superoxide dismutase |
| 4,4'-diaponeurosporenoate glycosyltransferase       | glucose-6-phosphate isomerase                  | ATP-dependent Clp protease ATP-binding subunit ClpC   |                      |
| 50S ribosomal protein L18                           | glycerol kinase                                | D-alanine--D-alanine ligase                           |                      |
| 50S ribosomal protein L21                           | hypothetical protein AXY36_04620               | dihydroxy-acid dehydratase                            |                      |
| 50S ribosomal protein L33                           | multidrug ABC transporter ATP-binding protein  | DNA helicase                                          |                      |
| 50S ribosomal protein L4                            | oligoribonuclease                              | DNA starvation/stationary phase protection protein    |                      |
| ATP synthase F0F1 subunit gamma                     | phosphoenolpyruvate-protein phosphotransferase | DNA-directed RNA polymerase subunit beta'             |                      |
| ATP-dependent Clp protease ATP-binding subunit ClpX | preprotein translocase subunit SecA            | excinuclease ABC subunit A                            |                      |
| DNA starvation/stationary phase protection protein  | putative phage/plasmid primase                 | ferrichrome ABC transporter substrate-binding protein |                      |

DNA-directed RNA  
polymerase subunit beta'  
Glutamyl  
endopeptidase  
precursor, serine  
proteinase SspA  
Lanthionine  
biosynthesis protein  
LanL  
Major myo-inositol  
transporter IolT  
UDP-N-  
acetylglucosamine 1-  
carboxyvinyltransfer  
ase  
acetate--CoA ligase  
acetyl-CoA  
acetyltransferase  
alanine racemase  
aminoacyltransferase  
autolysin  
beta-galactosidase

pyruvate oxidase

Fe-S cluster  
assembly protein  
SufB

glutamate  
dehydrogenase

glutamine  
amidotransferase

glutamine--fructose-  
6-phosphate  
aminotransferase

glutamine-  
hydrolyzing GMP  
synthase

glutaryl-CoA  
dehydrogenase

glycerol-3-phosphate  
cytidyltransferase

glyoxalase  
GTPase Era  
hypothetical protein  
A4A82\_03560  
hypothetical protein  
AXY36\_04520

**200 + 300 mg  
L-1**

bifunctional 5,10-  
methylene-  
tetrahydrofolate  
dehydrogenase/5,10-  
methylene-  
tetrahydrofolate  
cyclohydrolase  
catabolite control  
protein A  
  
catalase  
  
class I fructose-  
bisphosphate  
aldolase  
class II fumarate  
hydratase  
  
glucokinase  
  
glutamyl-tRNA  
synthetase  
glutaryl-CoA  
dehydrogenase  
  
glycerol kinase  
  
glycerol-3-phosphate  
dehydrogenase  
  
glyoxalase  
hydroxyacid  
dehydrogenase

hypothetical protein  
BSF33\_12980

intracellular protease  
amidase  
iron citrate ABC  
transporter substrate-  
binding protein

isoleucine--tRNA  
ligase

long-chain fatty acid--  
CoA ligase  
NAD-dependent  
dehydratase

NIF3 protein

peptidase

prolyl-tRNA  
synthetase

protein rlx

pyruvate oxidase

recombinase RecA

|                                                       |                                                                                            |
|-------------------------------------------------------|--------------------------------------------------------------------------------------------|
| hypothetical protein<br>AXY36_00580                   | recombinase XerD                                                                           |
| hypothetical protein<br>AXY36_07855                   | RLX protein                                                                                |
| hypothetical protein<br>BSF33_00540                   | scaffolding protein                                                                        |
| hypothetical protein<br>BSF33_09115                   | short-chain<br>dehydrogenase                                                               |
| isocitrate<br>dehydrogenase                           | thiol reductase                                                                            |
| magnesium<br>transporter CorA                         | thioredoxin                                                                                |
| malate<br>dehydrogenase<br>(acceptor)                 | thioredoxin-disulfide<br>reductase                                                         |
| ornithine--oxo-acid<br>aminotransferase               | transcription<br>termination/antitermi<br>nation protein NusG                              |
| phosphoenolpyruvate-<br>protein<br>phosphotransferase | UDP-N-<br>acetylmuramate--<br>alanine ligase                                               |
| phosphotransacetylase                                 | Uncharacterised<br>protein                                                                 |
| preprotein<br>translocase subunit<br>YajC             | undecaprenyldiphospho-<br>muramoylpentapeptide<br>beta-N-<br>acetylglucosaminyltransferase |
|                                                       | virulence factor                                                                           |

|                             |                                                                                                                                                                                                                                                                                    |                                                                                                                                                                                                                             |
|-----------------------------|------------------------------------------------------------------------------------------------------------------------------------------------------------------------------------------------------------------------------------------------------------------------------------|-----------------------------------------------------------------------------------------------------------------------------------------------------------------------------------------------------------------------------|
|                             | pyridoxamine 5-phosphate oxidase<br>pyruvate kinase<br>single-stranded DNA-binding protein<br>stage V sporulation protein G<br>transaldolase<br>transcriptional regulator<br>triose-phosphate isomerase<br>type I glyceraldehyde-3-phosphate dehydrogenase<br>urease subunit alpha |                                                                                                                                                                                                                             |
| <b>100 + 300 mg<br/>L-1</b> | alkyl hydroperoxide reductase                                                                                                                                                                                                                                                      | 3-hydroxy-3-methylglutaryl-CoA reductase<br>epimerase<br>esterase<br>glycosyl transferase family 2<br>octanoyltransferase<br>polyribonucleotide nucleotidyltransferase<br>elongation factor Ts<br>phosphopyruvate hydratase |

|                                   |                                                      |                                                                                  |                                    |                                     |                             |                                        |
|-----------------------------------|------------------------------------------------------|----------------------------------------------------------------------------------|------------------------------------|-------------------------------------|-----------------------------|----------------------------------------|
|                                   |                                                      |                                                                                  |                                    | succinate<br>dehydrogenase          |                             |                                        |
| <b>100 + 200 +<br/>300 mg L-1</b> | 30S ribosomal<br>protein S13                         | 6-phosphogluconate<br>dehydrogenase                                              | elongation factor Ts               | 50S ribosomal<br>protein L33        | octanoyltransferase         | 30S ribosomal<br>protein S10           |
|                                   | alpha/beta hydrolase                                 | elongation factor Ts                                                             | NAD(P)-dependent<br>oxidoreductase | autolysin                           | prephenate<br>dehydrogenase | 50S ribosomal<br>protein L22           |
|                                   | asparagine--tRNA<br>ligase                           | hypothetical protein                                                             | octanoyltransferase                | cell division protein<br>GpsB       |                             | NAD(P)-dependent<br>oxidoreductase     |
|                                   | DNA<br>methyltransferase                             | hypothetical protein<br>RES9_02285                                               | phosphopyruvate<br>hydratase       | enoyl-ACP reductase                 |                             | octanoyltransferase                    |
|                                   | DNA-directed RNA<br>polymerase subunit<br>alpha      | NAD(P)-dependent<br>oxidoreductase                                               | prephenate<br>dehydrogenase        | hypothetical protein<br>A4A82_03720 |                             | polysaccharide<br>biosynthesis protein |
|                                   | lysine--tRNA ligase                                  | peptidase M23                                                                    | sulfurtransferase<br>FdhD          | hypothetical protein<br>AXY36_01150 |                             |                                        |
|                                   | manganese-<br>dependent inorganic<br>pyrophosphatase | phosphogluconate<br>dehydrogenase<br>(NADP(+)-<br>dependent,<br>decarboxylating) |                                    | hypothetical protein<br>RES9_02285  |                             |                                        |
|                                   | NAD(P)-dependent<br>oxidoreductase                   | prephenate<br>dehydrogenase                                                      |                                    | prephenate<br>dehydrogenase         |                             |                                        |
|                                   | octanoyltransferase                                  | recombinase RecA                                                                 |                                    | sulfurtransferase                   |                             |                                        |
|                                   | phosphoglucosamine<br>mutase                         |                                                                                  |                                    |                                     |                             |                                        |
|                                   | prephenate<br>dehydrogenase                          |                                                                                  |                                    |                                     |                             |                                        |
|                                   | recombinase RecA                                     |                                                                                  |                                    |                                     |                             |                                        |
|                                   | universal stress<br>protein                          |                                                                                  |                                    |                                     |                             |                                        |
