# Supplementary material for: Proteomic response of marine-derived Staphylococcus cohnii #NIOSBK35 to varying Cr(vi) concentrations
Source: Royal Society of Chemistry journal article supplement (doi:10.1039/c9mt00089e), 2019-06-13
Supplement: c9mt00089e2.pdf [file c9mt00089e2.pdf]

### Consolidated list of down-regulated proteins expressed at different Cr (VI) concentrations at time points

| Cr (VI)<br>concentration | 6 h                                     | 9 h                                               | 12 h                      | 18 h                                    | 24 h                             | 36 h                |
|--------------------------|-----------------------------------------|---------------------------------------------------|---------------------------|-----------------------------------------|----------------------------------|---------------------|
|                          | 1-pyrroline-5-carboxylate dehydrogenase | 1,4-dihydroxy-2-naphthoyl-CoA synthase            | 50S ribosomal protein L27 | 1,4-dihydroxy-2-naphthoyl-CoA synthase  | hypothetical protein A4A82_03560 | DNA-binding protein |
|                          | 2-oxoglutarate dehydrogenase E1         | 30S ribosomal protein S1                          |                           | 1-pyrroline-5-carboxylate dehydrogenase |                                  |                     |
|                          | 2-oxoisovalerate dehydrogenase          | ATP-dependent Zn metalloproteinase                |                           | 2-deoxyribose-5-phosphate aldolase      |                                  |                     |
|                          | 30S ribosomal protein S10               | DNA-directed RNA polymerase subunit beta'         |                           | 3-hexulose-6-phosphate synthase         |                                  |                     |
|                          | 30S ribosomal protein S11               | UDP-N-acetylglucosamine 1-carboxyvinyltransferase |                           | 3-hydroxyacyl-CoA dehydrogenase         |                                  |                     |
|                          | 30S ribosomal protein S16               | enoyl-ACP reductase                               |                           | 30S ribosomal protein S2                |                                  |                     |
|                          | 30S ribosomal protein S17               | ferritin                                          |                           | 30S ribosomal protein S3                |                                  |                     |
|                          | 30S ribosomal protein S20               | fructose-bisphosphate aldolase                    |                           | 30S ribosomal protein S5                |                                  |                     |
|                          | 30S ribosomal protein S3                | hypothetical protein BSF33_05765                  |                           | 30S ribosomal protein S6                |                                  |                     |

|                                               |                                 |                                                       |
|-----------------------------------------------|---------------------------------|-------------------------------------------------------|
| 30S ribosomal protein S4                      | malate dehydrogenase (acceptor) | 30S ribosomal protein S7                              |
| 30S ribosomal protein S5                      | oligoribonuclease               | 5'(3')-deoxyribonucleotidase                          |
| 30S ribosomal protein S7                      | purine-nucleoside phosphorylase | 50S ribosomal protein L10                             |
| 30S ribosomal protein S9                      |                                 | 50S ribosomal protein L13                             |
| 4,4'-diaponeurosporenoate glycosyltransferase |                                 | 50S ribosomal protein L19                             |
| 50S ribosomal protein L11                     |                                 | 50S ribosomal protein L24                             |
| 50S ribosomal protein L13                     |                                 | 50S ribosomal protein L25                             |
| 50S ribosomal protein L14                     |                                 | 50S ribosomal protein L29                             |
| 50S ribosomal protein L15                     |                                 | 50S ribosomal protein L7/L12                          |
| 50S ribosomal protein L21                     |                                 | ABC transporter ATP-binding protein                   |
| 50S ribosomal protein L23                     |                                 | ATP synthase F0F1 CDP-glycerol:poly(glycerophosphate) |
| 50S ribosomal protein L25                     |                                 | D-alanine aminotransferase                            |

50S ribosomal  
protein L27

50S ribosomal  
protein L30

50S ribosomal

50S ribosomal  
protein L33

50S ribosomal  
protein L4

50S ribosomal  
protein L6

ABC transporter  
ATP-binding protein

ATP-dependent Clp  
protease proteolytic  
subunit

DNA-directed RNA  
polymerase subunit  
beta

F0F1 ATP synthase  
subunit beta

IMP dehydrogenase

DNA-binding  
protein

DNA-directed RNA  
polymerase subunit  
beta'

F0F1 ATP synthase

Fe-S cluster  
assembly protein

SufD

GTPase Era

GTPase ObgE

NADH  
dehydrogenase

Oligoendopeptidase  
F

PTS glucose  
transporter subunit  
IIA

ThiJ/PfpI family  
protein

UDP-glucose 4-  
epimerase

UDP-N-  
acetylglucosamine 1-  
carboxyvinyltransfer  
ase

beta-ketoacyl-ACP  
reductase

beta-ketoacyl-[acyl-  
carrier-protein]  
synthase II

branched-chain  
alpha-keto acid  
dehydrogenase  
subunit E2

catabolite control  
protein A

catalase

cell division protein  
FtsZ

cell division protein  
GpsB

citrate synthase

cysteine synthase  
dihydrolipoyl  
dehydrogenase

acetyltransferase

aldehyde  
dehydrogenase

alkaline shock  
protein 23

aspartate  
aminotransferase

bifunctional 5,10-  
methylene-  
tetrahydrofolate  
dehydrogenase/5,10-  
cell division protein  
DivIVA

citrate synthase

class I fructose-  
biphosphate  
aldolase

cold-shock protein

cysteine synthase  
dihydroxyacetone  
kinase subunit L

**100 mg L-1**

elongation factor G

elongation factor Tu

fructose-  
biphosphate  
aldolase

glutamine--fructose-  
6-phosphate  
aminotransferase

glycerol kinase

glycerol-3-phosphate  
cytidyltransferase

glycerol-3-phosphate  
dehydrogenase

glycine C-  
acetyltransferase  
glycine cleavage  
system protein T

hypothetical protein  
AXY36\_00580

hypothetical protein  
RES9\_02285

elongation factor P

enolase

glutamate  
dehydrogenase

glutamine--fructose-  
6-phosphate  
aminotransferase

glutaryl-CoA  
dehydrogenase

glycerol kinase

glycine C-  
acetyltransferase

glycine--tRNA  
ligase  
hydroxyacid  
dehydrogenase

hypothetical protein  
A4A82\_02240

hypothetical protein  
A4A82\_08945

lipid hydroperoxide  
peroxidase

hypothetical protein  
A4A82\_09265

malate:quinone  
oxidoreductase

hypothetical protein  
A4A82\_12170

molecular chaperone  
DnaK

hypothetical protein  
AXY36\_02415

ornithine--oxo-acid  
aminotransferase

hypothetical protein  
AXY36\_02580

pyruvate kinase

hypothetical protein  
AXY36\_03955

serine  
hydroxymethyltransf  
erase

hypothetical protein  
AXY36\_06600

single-stranded  
DNA-binding  
protein

hypothetical protein  
AXY36\_06780

stage V sporulation  
protein G

hypoxanthine  
phosphoribosyltransf  
erase

succinate--CoA  
ligase subunit alpha

malate  
dehydrogenase  
(acceptor)

succinate--CoA  
ligase subunit beta

malate:quinone  
oxidoreductase

transaldolase

transcription  
elongation factor  
GreA

transglycosylase

transketolase

translation initiation  
factor IF-3

trigger factor  
triose-phosphate  
isomerase

type I glutamate--  
ammonia ligase

type I  
glyceraldehyde-3-  
universal stress  
protein UspA

manganese-  
dependent inorganic  
pyrophosphatase

metal-dependent  
hydrolase

methionine sulfoxide  
molecular chaperone  
DnaK

oligoribonuclease

peptidase

peptidase M28

phosphoenolpyruvat  
e-protein  
phosphotransferase

phosphonate ABC  
transporter ATP-

pyruvate kinase

pyruvate oxidase  
pyruvate, phosphate  
ribosome recycling  
factor

sigma-54  
modulation protein

stage V sporulation  
protein G

succinate  
dehydrogenase  
flavoprotein subunit

succinate--CoA  
ligase subunit alpha

superoxide  
dismutase  
thiol reductase  
thioredoxin  
thioredoxin-disulfide  
transketolase  
translation initiation  
translation initiation  
type I  
glyceraldehyde-3-  
phosphate  
dehydrogenase  
universal stress  
protein  
universal stress  
protein UspA  
uracil  
uridylate kinase

**200 mg L<sup>-1</sup>**

ATP-dependent Clp  
protease ATP-  
binding subunit  
ClpX



|               |                                           |                                                  |                                  |                           |                                |  |
|---------------|-------------------------------------------|--------------------------------------------------|----------------------------------|---------------------------|--------------------------------|--|
|               |                                           | sulfurtransferase                                |                                  |                           |                                |  |
| peptidase M23 | 30S ribosomal protein S10                 | 30S ribosomal protein S16                        | 30S ribosomal protein S10        | 30S ribosomal protein S17 | 2-oxoisovalerate dehydrogenase |  |
|               | 30S ribosomal protein S16                 | 30S ribosomal protein S19                        | 30S ribosomal protein S18        | 30S ribosomal protein S19 | 30S ribosomal protein S19      |  |
|               | 30S ribosomal protein S9                  | beta-ketoacyl-[acyl-carrier-protein] synthase II | 30S ribosomal protein S9         | 50S ribosomal protein L1  | 30S ribosomal protein S4       |  |
|               | 50S ribosomal protein L1                  | class I fructose-bisphosphate aldolase           | 50S ribosomal protein L15        | 50S ribosomal protein L11 | 30S ribosomal protein S8       |  |
|               | 50S ribosomal protein L14                 | universal stress protein                         | 50S ribosomal protein L18        | 50S ribosomal protein L14 | 30S ribosomal protein S9       |  |
|               | 50S ribosomal protein L18                 |                                                  | 50S ribosomal protein L27        | 50S ribosomal protein L15 | 50S ribosomal protein L1       |  |
|               | 50S ribosomal protein L23                 |                                                  | 50S ribosomal protein L28        | 50S ribosomal protein L17 | 50S ribosomal protein L14      |  |
|               | 50S ribosomal protein L30                 |                                                  | 50S ribosomal protein L3         | 50S ribosomal protein L18 | 50S ribosomal protein L15      |  |
|               | 50S ribosomal protein L33                 |                                                  | 50S ribosomal protein L30        | 50S ribosomal protein L23 | 50S ribosomal protein L17      |  |
|               | DNA-directed RNA polymerase subunit alpha |                                                  | 50S ribosomal protein L4         | 50S ribosomal protein L3  | 50S ribosomal protein L23      |  |
|               | glutamyl-tRNA synthetase                  |                                                  | 6-phosphogluconate dehydrogenase | 50S ribosomal protein L30 | 50S ribosomal protein L30      |  |
|               | glycine--tRNA ligase                      |                                                  | alanine racemase                 | 50S ribosomal protein L33 | 50S ribosomal protein L4       |  |

300 mg L-1

|                                                 |                                                     |                                                     |                                                         |
|-------------------------------------------------|-----------------------------------------------------|-----------------------------------------------------|---------------------------------------------------------|
| octanoyltransferase                             | aminoacyltransferase                                | 50S ribosomal protein L4                            | branched-chain alpha-keto acid dehydrogenase subunit E2 |
| preprotein translocase subunit YajC             | asparagine--tRNA ligase                             | aminoacyltransferase                                | cell division protein FtsZ                              |
| pyruvate kinase                                 | ATP-dependent Clp protease ATP-binding subunit ClpX | ATP-dependent Clp protease ATP-binding subunit ClpX | DNA-directed RNA polymerase subunit beta                |
| succinate--CoA ligase subunit beta              | ATP-dependent Zn metalloproteinase                  | beta-ketoacyl-[acyl-carrier-protein] synthase II    | elongation factor Ts                                    |
| transcription elongation factor GreA            | beta-ketoacyl-[acyl-carrier-protein] synthase II    | cell division protein FtsZ                          | fructose-bisphosphate aldolase                          |
| type I glyceraldehyde-3-phosphate dehydrogenase | beta-ketoacyl-ACP reductase                         | DNA-directed RNA polymerase subunit alpha           | hsp90-like protein                                      |
|                                                 | glucokinase                                         | fructose-bisphosphate aldolase                      | malate:quinone oxidoreductase                           |
|                                                 | glucosamine-6-phosphate isomerase                   | glutamyl-tRNA amidotransferase                      | pyridoxamine 5-phosphate oxidase                        |
|                                                 | glutamyl-tRNA amidotransferase                      | hypothetical protein                                | trigger factor                                          |

|  |                                    |                                    |                                      |                                     |                                                 |
|--|------------------------------------|------------------------------------|--------------------------------------|-------------------------------------|-------------------------------------------------|
|  |                                    |                                    | glutamyl-tRNA synthetase             | hypothetical protein RES9_02285     | type I glyceraldehyde-3-phosphate dehydrogenase |
|  |                                    |                                    | hypothetical protein AXY36_09360     | lysine--tRNA ligase                 |                                                 |
|  |                                    |                                    | IMP dehydrogenase                    | NAD(P)-dependent oxidoreductase     |                                                 |
|  |                                    |                                    | isocitrate dehydrogenase             | preprotein translocase subunit YajC |                                                 |
|  |                                    |                                    | lysine--tRNA ligase                  | pyridoxamine 5-phosphate oxidase    |                                                 |
|  |                                    |                                    | methionine--tRNA ligase              |                                     |                                                 |
|  |                                    |                                    | peptidase M23                        |                                     |                                                 |
|  |                                    |                                    | preprotein translocase subunit YajC  |                                     |                                                 |
|  |                                    |                                    | ribonuclease R                       |                                     |                                                 |
|  |                                    |                                    | single-stranded DNA-binding protein  |                                     |                                                 |
|  |                                    |                                    | urease subunit alpha                 |                                     |                                                 |
|  | 2-deoxyribose-5-phosphate aldolase | 2-deoxyribose-5-phosphate aldolase | Fis family transcriptional regulator | alpha/beta hydrolase                |                                                 |

|                                            |                                     |                                                           |
|--------------------------------------------|-------------------------------------|-----------------------------------------------------------|
| 30S ribosomal protein S1                   | histidine kinase                    | L-serine dehydratase, iron-sulfur-dependent subunit alpha |
| 30S ribosomal protein S15                  | hypothetical protein<br>AXY36_01150 | adenylosuccinate synthetase                               |
| 30S ribosomal protein S19                  | hypothetical protein<br>BSF33_08575 | alkaline-shock protein                                    |
| 30S ribosomal protein S2                   | phosphopyruvate hydratase           | alpha/beta hydrolase                                      |
| 30S ribosomal protein S6                   |                                     | aspartate-semialdehyde dehydrogenase                      |
| 30S ribosomal protein S8                   |                                     | branched-chain amino acid aminotransferase                |
| 3-oxoacyl-[acyl-carrier protein] reductase |                                     | elastin-binding protein                                   |
| 50S ribosomal protein L1                   |                                     | malonyl CoA-acyl carrier protein transacylase             |
| 50S ribosomal protein L10                  |                                     | purine-nucleoside phosphorylase                           |
| 50S ribosomal protein L17                  |                                     |                                                           |
| 50S ribosomal protein L19                  |                                     |                                                           |

50S ribosomal  
protein L24  
50S ribosomal  
protein L29  
50S ribosomal  
protein L3  
50S ribosomal  
protein L31  
50S ribosomal  
protein L5  
50S ribosomal  
protein L7/L12  
  
aconitate hydratase  
  
acyl carrier protein  
  
adenylate kinase  
alanine  
dehydrogenase  
alkaline shock  
protein 23  
anti-anti-sigma  
factor  
  
ATP synthase F0F1  
subunit alpha  
  
ATP synthase F0F1  
subunit delta

ATP-dependent Zn  
metallopeptidase

CDP-  
glycerol:poly(glycer  
ophosphate)  
glycerophosphotrans  
ferase

chorismate mutase

cold-shock protein

delta-aminolevulinic  
acid dehydratase

dihydrolipoamide  
succinyltransferase

dihydroxyacetone  
kinase subunit L

DNA-binding  
protein

elongation factor P

endoribonuclease L-  
PSP

enolase

enoyl-ACP reductase

ferritin

100 + 200 mg L<sup>-1</sup>

Fe-S cluster  
assembly protein  
SufB  
Fe-S cluster  
assembly protein  
SufD  
  
glucose-6-phosphate  
isomerase  
  
glutamate  
dehydrogenase  
glutamine-  
hydrolyzing GMP  
synthase  
glycine--tRNA  
ligase  
heme-binding  
protein  
  
hydroxymethylpyrim  
idine/phosphomethyl  
pyrimidine kinase  
  
hypothetical protein  
A4A82\_02240  
  
hypothetical protein  
A4A82\_03560  
  
hypothetical protein  
A4A82\_07220

hypothetical protein  
A4A82\_09265

hypothetical protein  
AXY36\_02580

hypothetical protein  
BSF33\_05765

hypothetical protein  
RES13\_12170,  
partial

hypothetical protein  
XA22\_10040

inosine-5-  
monophosphate  
dehydrogenase

iron ABC transporter  
substrate-binding  
protein

lactate  
dehydrogenase  
late competence  
protein ComEC

methionine sulfoxide  
reductase



NADH

dehydrogenase

nitric oxide

dioxygenase

nucleoside-

diphosphate kinase

ornithine--oxo-acid

transaminase

peroxiredoxin

Phosphate

acetyltransferase

phosphoglycerate

kinase

PTS glucose

transporter subunit

IIA

putative transporter

pyruvate

dehydrogenase

(acetyl-transferring)

E1 component

subunit alpha

pyruvate, phosphate

dikinase

ribose-phosphate

pyrophosphokinase

ribosome recycling  
factor  
short-chain  
dehydrogenase  
  
succinate  
dehydrogenase  
flavoprotein subunit  
  
superoxide  
dismutase  
thiol reductase  
thioredoxin  
thioredoxin  
thymidine  
phosphorylase  
transcriptional  
repressor CodY  
  
Translation  
elongation factor Ts  
  
translation initiation  
factor IF-1  
  
UDP-glucose 4-  
epimerase  
UDP-N-acetyl-D-  
galactosamine  
dehydrogenase  
uracil  
phosphoribosyltransf  
erase

|                              |                              |                                               |                                      |                                                                     |                                  |                                         |
|------------------------------|------------------------------|-----------------------------------------------|--------------------------------------|---------------------------------------------------------------------|----------------------------------|-----------------------------------------|
| 200 + 300 mg L <sup>-1</sup> | pathogenicity island protein | 30S ribosomal protein S14                     | transcription elongation factor GreA | DNA polymerase III subunit alpha                                    | DNA polymerase III subunit alpha | Short-chain dehydrogenase/reductase SDR |
|                              |                              | catabolite control protein A                  |                                      | VOC family protein                                                  | hypothetical protein AXY36_09360 | alkyl hydroperoxide reductase           |
|                              |                              | cell division protein GpsB                    |                                      | hypothetical protein AXY36_04620                                    | isocitrate dehydrogenase         | hypothetical protein AXY36_09360        |
|                              |                              | glucosamine-6-phosphate isomerase             |                                      | phosphogluconate dehydrogenase (NADP(+)-dependent, decarboxylating) |                                  | isocitrate dehydrogenase                |
|                              |                              | glycine C-acetyltransferase                   |                                      | pyrimidine-nucleoside phosphorylase                                 |                                  | transcriptional regulator               |
|                              |                              | hypothetical protein A4A82_08725              |                                      |                                                                     |                                  |                                         |
|                              |                              | hypothetical protein BSF33_04470              |                                      |                                                                     |                                  |                                         |
|                              |                              | isocitrate dehydrogenase                      |                                      |                                                                     |                                  |                                         |
|                              |                              | manganese-dependent inorganic pyrophosphatase |                                      |                                                                     |                                  |                                         |
|                              |                              | membrane protein                              |                                      |                                                                     |                                  |                                         |

|  |                                     |                                     |                                                                           |                                                                                                                                |                                                                           |                                                |
|--|-------------------------------------|-------------------------------------|---------------------------------------------------------------------------|--------------------------------------------------------------------------------------------------------------------------------|---------------------------------------------------------------------------|------------------------------------------------|
|  |                                     |                                     | sufurtransferase<br>FdhD<br>transglycosylase                              |                                                                                                                                |                                                                           |                                                |
|  | 30S ribosomal<br>protein S14        | 2-oxoglutarate<br>dehydrogenase E1  | 2,3-<br>bisphosphoglycerate-<br>independent<br>phosphoglycerate<br>mutase | 2,3-<br>bisphosphoglycerate-<br>independent<br>phosphoglycerate<br>mutase                                                      | 2,3-<br>bisphosphoglycerate-<br>independent<br>phosphoglycerate<br>mutase | 1-pyrroline-5-<br>carboxylate<br>dehydrogenase |
|  | 50S ribosomal<br>protein L36        | 2-oxoisovalerate<br>dehydrogenase   | 3-hexulose-6-<br>phosphate synthase                                       | 2-oxoglutarate<br>dehydrogenase E1                                                                                             | 2-deoxyribose-5-<br>phosphate aldolase                                    | 30S ribosomal<br>protein S20                   |
|  | acetyltransferase                   | 3-hexulose-6-<br>phosphate synthase | 30S ribosomal<br>protein S1                                               | 2-oxoglutarate<br>ferredoxin<br>oxidoreductase<br>subunit alpha<br>3-methyl-2-<br>oxobutanoate<br>hydroxymethyltransf<br>erase | 2-oxoglutarate<br>dehydrogenase E1                                        | 30S ribosomal<br>protein S5                    |
|  | elongation factor Ts                | 30S ribosomal<br>protein S11        | 30S ribosomal<br>protein S2                                               |                                                                                                                                | 2-oxoisovalerate<br>dehydrogenase                                         | 30S ribosomal<br>protein S7                    |
|  | hypothetical protein<br>AXY36_09360 | 30S ribosomal<br>protein S17        | 30S ribosomal<br>protein S20                                              | 30S ribosomal<br>protein S1                                                                                                    | 3-hexulose-6-<br>phosphate synthase                                       | 50S ribosomal<br>protein L16                   |
|  |                                     | 30S ribosomal<br>protein S19        | 30S ribosomal<br>protein S3                                               | 30S ribosomal<br>protein S11                                                                                                   | 30S ribosomal<br>protein S11                                              | 50S ribosomal<br>protein L2                    |
|  |                                     | 30S ribosomal<br>protein S3         | 30S ribosomal<br>protein S4                                               | 30S ribosomal<br>protein S13                                                                                                   | 30S ribosomal<br>protein S13                                              | 50S ribosomal<br>protein L7/L12                |
|  |                                     | 30S ribosomal<br>protein S4         | 30S ribosomal<br>protein S5                                               | 30S ribosomal<br>protein S15                                                                                                   | 30S ribosomal<br>protein S15                                              | ATP synthase F0F1<br>subunit alpha             |

|                           |                           |                                       |                           |                                                |
|---------------------------|---------------------------|---------------------------------------|---------------------------|------------------------------------------------|
| 30S ribosomal protein S5  | 30S ribosomal protein S6  | 30S ribosomal protein S16             | 30S ribosomal protein S16 | ATP-dependent Clp protease proteolytic subunit |
| 30S ribosomal protein S6  | 30S ribosomal protein S8  | 50S ribosomal protein L1              | 30S ribosomal protein S18 | F0F1 ATP synthase subunit beta                 |
| 30S ribosomal protein S7  | 50S ribosomal protein L10 | 50S ribosomal protein L16             | 30S ribosomal protein S2  | IMP dehydrogenase                              |
| 30S ribosomal protein S8  | 50S ribosomal protein L13 | 50S ribosomal protein L21             | 30S ribosomal protein S20 | NADH dehydrogenase                             |
| 50S ribosomal protein L10 | 50S ribosomal protein L15 | 50S ribosomal protein L36             | 30S ribosomal protein S3  | PTS glucose transporter subunit IIA            |
| 50S ribosomal protein L11 | 50S ribosomal protein L17 | 8-amino-7-oxononanoate synthase       | 30S ribosomal protein S4  | aconitate hydratase                            |
| 50S ribosomal protein L13 | 50S ribosomal protein L18 | ATP synthase F0F1 subunit B           | 30S ribosomal protein S5  | alpha/beta hydrolase                           |
| 50S ribosomal protein L17 | 50S ribosomal protein L21 | ATP synthase F0F1 subunit delta       | 30S ribosomal protein S6  | beta-ketoacyl-ACP reductase                    |
| 50S ribosomal protein L21 | 50S ribosomal protein L22 | DNA polymerase III subunit beta       | 30S ribosomal protein S7  | class I fructose-bisphosphate aldolase         |
| 50S ribosomal protein L22 | 50S ribosomal protein L23 | DNA primase                           | 30S ribosomal protein S8  | dihydrolipoamide succinyltransferase           |
| 50S ribosomal protein L25 | 50S ribosomal protein L24 | LysR family transcriptional regulator | 30S ribosomal protein S9  | dihydrolipoyl dehydrogenase                    |

|                                                               |                                                |                                            |                           |                                   |
|---------------------------------------------------------------|------------------------------------------------|--------------------------------------------|---------------------------|-----------------------------------|
| 50S ribosomal protein L27                                     | 50S ribosomal protein L25                      | NAD kinase                                 | 50S ribosomal protein L10 | dihydroxyacetone kinase subunit L |
| 50S ribosomal protein L3                                      | 50S ribosomal protein L29                      | Translation elongation factor Ts           | 50S ribosomal protein L13 | elongation factor G               |
| 50S ribosomal protein L31                                     | 50S ribosomal protein L3                       | UDP-N-acetyl-D-galactosamine dehydrogenase | 50S ribosomal protein L16 | elongation factor Tu              |
| 50S ribosomal protein L4                                      | 50S ribosomal protein L30                      | acetate kinase                             | 50S ribosomal protein L19 | ferritin                          |
| 50S ribosomal protein L5                                      | 50S ribosomal protein L31                      | alanine dehydrogenase                      | 50S ribosomal protein L21 | glucosamine-6-phosphate isomerase |
| 50S ribosomal protein L6                                      | 50S ribosomal protein L5                       | alcohol dehydrogenase                      | 50S ribosomal protein L22 | glutamyl-tRNA synthetase          |
| 50S ribosomal protein L7/L12                                  | 50S ribosomal protein L6                       | anti-anti-sigma factor                     | 50S ribosomal protein L24 | hydroxyacid dehydrogenase         |
| ABC transporter ATP-binding protein                           | 50S ribosomal protein L7/L12                   | anti-sigma B factor RsbW                   | 50S ribosomal protein L25 | hypothetical protein A4A82_02240  |
| ATP-dependent Clp protease proteolytic subunit                | 6-phosphogluconate dehydrogenase               | catabolite control protein A               | 50S ribosomal protein L27 | hypothetical protein A4A82_07220  |
| CDP-glycerol:poly(glycerophosphate) glycerophosphotransferase | ABC transporter ATP-binding protein            | chorismate mutase                          | 50S ribosomal protein L29 | hypothetical protein AXY36_00580  |
| D-alanine aminotransferase                                    | ATP-dependent Clp protease proteolytic subunit | cysteine desulfurase                       | 50S ribosomal protein L31 | hypothetical protein BSF33_05765  |

|                                                    |                                                    |                                         |                                                |                                                                         |
|----------------------------------------------------|----------------------------------------------------|-----------------------------------------|------------------------------------------------|-------------------------------------------------------------------------|
| DNA gyrase subunit A                               | DNA starvation/stationary phase protection protein | delta-aminolevulinic acid dehydratase   | 50S ribosomal protein L5                       | iron ABC transporter substrate-binding protein                          |
| DNA starvation/stationary phase protection protein | DNA-binding protein                                | dephospho-CoA kinase                    | 50S ribosomal protein L6                       | nitric oxide dioxygenase                                                |
| DNA-directed RNA polymerase subunit beta           | DNA-directed RNA polymerase subunit alpha          | dihydrolipoamide succinyltransferase    | 50S ribosomal protein L7/L12                   | ornithine--oxo-acid aminotransferase                                    |
| F0F1 ATP synthase subunit beta                     | DNA-directed RNA polymerase subunit beta           | dihydrolipoyl dehydrogenase             | ABC transporter ATP-binding protein            | peroxiredoxin                                                           |
| Fe-S cluster assembly protein SufB                 | DNA-directed RNA polymerase subunit beta'          | elongation factor Tu                    | ATP synthase F0F1 subunit alpha                | phosphoglycerate kinase                                                 |
| Fe-S cluster assembly protein SufD                 | Fe-S cluster assembly protein SufD                 | endopeptidase Clp ATP-binding subunit C | ATP-dependent Clp protease proteolytic subunit | phosphopyruvate hydratase                                               |
| NADH dehydrogenase                                 | IMP dehydrogenase                                  | endoribonuclease L-PSP                  | ATP-dependent Zn metallopeptidase              | pyruvate dehydrogenase (acetyl-transferring) E1 component subunit alpha |
| PTS glucose transporter subunit IIA                | NADH dehydrogenase                                 | ferritin                                | D-alanine aminotransferase                     | pyruvate kinase                                                         |

|                                                         |                                                   |                                                         |                                                    |                                     |
|---------------------------------------------------------|---------------------------------------------------|---------------------------------------------------------|----------------------------------------------------|-------------------------------------|
| UDP-N-acetyl-D-galactosamine dehydrogenase              | PTS glucose transporter subunit IIA               | formate--tetrahydrofolate ligase                        | DNA starvation/stationary phase protection protein | serine hydroxymethyltransferase     |
| acyl carrier protein                                    | Translation elongation factor Ts                  | general stress protein                                  | DNA-binding protein                                | succinate--CoA ligase subunit alpha |
| adenylate kinase                                        | UDP-N-acetylglucosamine 1-carboxyvinyltransferase | glucose-6-phosphate isomerase                           | DNA-directed RNA polymerase subunit beta           | succinate--CoA ligase subunit beta  |
| alkaline shock protein 23                               | UDP-glucose 4-epimerase                           | glycerol-3-phosphate dehydrogenase                      | DNA-directed RNA polymerase subunit beta'          | transketolase                       |
| branched-chain alpha-keto acid dehydrogenase subunit E2 | aconitate hydratase                               | glycine cleavage system protein T                       | F0F1 ATP synthase subunit beta                     | universal stress protein UspA       |
| cell division protein FtsZ                              | acyl carrier protein                              | glycine dehydrogenase                                   | Fe-S cluster assembly protein SufB                 | uracil phosphoribosyltransferase    |
| class I fructose-bisphosphate aldolase                  | adenylate kinase                                  | heme-binding protein                                    | Fe-S cluster assembly protein SufD                 |                                     |
| cysteine synthase                                       | beta-ketoacyl-ACP reductase                       | hydroxymethylpyrimidine/phosphomethyl pyrimidine kinase | IMP dehydrogenase                                  |                                     |



|                                    |                                                         |                                  |                                                               |
|------------------------------------|---------------------------------------------------------|----------------------------------|---------------------------------------------------------------|
| dihydrolipoyl dehydrogenase        | branched-chain alpha-keto acid dehydrogenase subunit E2 | hypothetical protein A4A82_07220 | NADH dehydrogenase                                            |
| elongation factor G                | cell division protein FtsZ                              | hypothetical protein AXY36_00580 | Oligoendopeptidase F                                          |
| elongation factor P                | chorismate mutase                                       | hypothetical protein AXY36_05930 | PTS glucose transporter subunit IIA                           |
| elongation factor Tu               | cold-shock protein                                      | hypothetical protein AXY36_07855 | Phosphate acetyltransferase                                   |
| enolase                            | elongation factor G                                     | hypothetical protein BSF33_00215 | RNA-binding protein                                           |
| glycerol-3-phosphate dehydrogenase | elongation factor Tu                                    | hypothetical protein BSF33_00540 | Ribonucleotide reductase of class Ib (aerobic), alpha subunit |
| glycine cleavage system protein H  | enolase                                                 | hypothetical protein BSF33_00755 | Translation elongation factor Ts                              |
| glycine cleavage system protein T  | enoyl-ACP reductase                                     | hypothetical protein BSF33_05765 | UDP-N-acetylglucosamine 1-carboxyvinyltransferase             |

|                                                         |                                    |                                                     |                                                   |
|---------------------------------------------------------|------------------------------------|-----------------------------------------------------|---------------------------------------------------|
| hydroxymethylpyrimidine/phosphomethyl pyrimidine kinase | fructose-bisphosphate aldolase     | hypothetical protein RES10_11420                    | UDP-glucose 4-epimerase                           |
| hypothetical protein XA22_10040                         | glucose-6-phosphate isomerase      | hypothetical protein XA22_10040                     | acetate kinase                                    |
| lipid hydroperoxide peroxidase                          | glycerol-3-phosphate dehydrogenase | iron ABC transporter substrate-binding protein      | acetyltransferase                                 |
| malate:quinone oxidoreductase                           | glycine C-acetyltransferase        | isoleucyl-tRNA synthetase, partial                  | adenylate kinase                                  |
| mobilization protein C (plasmid)                        | glycine--tRNA ligase               | late competence protein ComEC                       | alanine--tRNA ligase                              |
| molecular chaperone DnaK                                | glyoxalase                         | lipoate--protein ligase                             | aldehyde dehydrogenase                            |
| peptidase M24                                           | hydroxymethylglutaryl-CoA synthase | malate dehydrogenase                                | alkaline shock protein 23                         |
| phosphoglycerate kinase                                 | hypothetical protein A4A82_06020   | manganese ABC transporter substrate-binding protein | aminopeptidase                                    |
| pseudouridine synthase                                  | hypothetical protein A4A82_07220   | nucleoside-diphosphate kinase                       | aspartyl/glutamyl-tRNA amidotransferase subunit A |

100 + 300 mg L<sup>-1</sup>

|                                                                         |                                               |                                                 |                                                                                                           |
|-------------------------------------------------------------------------|-----------------------------------------------|-------------------------------------------------|-----------------------------------------------------------------------------------------------------------|
| pyridoxamine 5-phosphate oxidase                                        | hypothetical protein A4A82_11275              | peroxiredoxin                                   | bifunctional 5,10-methylene-tetrahydrofolate dehydrogenase/5,10-methylene-tetrahydrofolate cyclohydrolase |
| pyruvate dehydrogenase (acetyl-transferring) E1 component subunit alpha | malate dehydrogenase (acceptor)               | phosphoenolpyruvate carboxykinase               | branched-chain alpha-keto acid dehydrogenase subunit E2                                                   |
| recombinase A                                                           | malate:quinone oxidoreductase                 | phosphoenolpyruvate synthase regulatory protein | catabolite control protein A                                                                              |
| ribose-phosphate pyrophosphokinase                                      | malonyl CoA-acyl carrier protein transacylase | phosphoglycerate kinase                         | cell division protein DivIVA                                                                              |
| ribosome recycling factor                                               | manganese-dependent inorganic pyrophosphatase | phosphopentomutase                              | cell division protein GpsB                                                                                |
| serine hydroxymethyltransferase                                         | metal-dependent hydrolase                     | polynucleotide phosphorylase                    | chorismate mutase                                                                                         |
| succinate--CoA ligase subunit alpha                                     | peroxiredoxin                                 | preprotein translocase subunit SecA             | class I fructose-bisphosphate aldolase                                                                    |
| superoxide dismutase                                                    | phosphoglycerate kinase                       | proline dehydrogenase                           | cold-shock protein                                                                                        |

|                                                        |                                                                         |                                                                         |                             |
|--------------------------------------------------------|-------------------------------------------------------------------------|-------------------------------------------------------------------------|-----------------------------|
| tail protein                                           | purine-nucleoside phosphorylase                                         | pyruvate dehydrogenase (acetyl-transferring) E1 component subunit alpha | cysteine synthase           |
| transaldolase                                          | pyruvate dehydrogenase (acetyl-transferring) E1 component subunit alpha | quinone oxidoreductase                                                  | dihydrolipoyl dehydrogenase |
| transcription termination/antitermination protein NusA | pyruvate kinase                                                         | ribose-phosphate pyrophosphokinase                                      | elongation factor G         |
| transcriptional repressor CodY                         | pyruvate oxidase                                                        | serine hydroxymethyltransferase                                         | elongation factor P         |
| translation initiation factor IF-1                     | ribose-phosphate pyrophosphokinase                                      | signal recognition particle                                             | elongation factor Tu        |
| trigger factor                                         | serine hydroxymethyltransferase                                         | succinyl-diaminopimelate desuccinylase                                  | endoribonuclease L-PSP      |
| triose-phosphate isomerase                             | superoxide dismutase                                                    | thioredoxin                                                             | enolase                     |
| universal stress protein UspA                          | thiol reductase thioredoxin                                             | thymidine phosphorylase                                                 | enoyl-ACP reductase         |

|                                         |                                                 |                                                               |                                            |
|-----------------------------------------|-------------------------------------------------|---------------------------------------------------------------|--------------------------------------------|
| uracil<br>phosphoribosyltransf<br>erase | thioredoxin-disulfide<br>reductase              | transaldolase                                                 | ferritin                                   |
| uridylate kinase                        | transaldolase                                   | transcription<br>termination/antiterm<br>ination protein NusA | general stress protein                     |
|                                         | transcriptional<br>regulator                    | transcriptional<br>regulator                                  | glucosamine-6-<br>phosphate isomerase      |
|                                         | transketolase                                   | transcriptional<br>repressor CodY                             | glucose-6-phosphate<br>isomerase           |
|                                         | translation initiation<br>factor IF-2           | triose-phosphate<br>isomerase                                 | glutamate<br>dehydrogenase                 |
|                                         | translation initiation<br>factor IF-3           | type I glutamate--<br>ammonia ligase                          | glutamyl-tRNA<br>synthetase                |
|                                         | trigger factor<br>type I                        |                                                               | glycerol kinase                            |
|                                         | glyceraldehyde-3-<br>phosphate<br>dehydrogenase |                                                               | glycerol-3-phosphate<br>cytidyltransferase |
|                                         |                                                 |                                                               | glycerol-3-phosphate<br>dehydrogenase      |
|                                         |                                                 |                                                               | glycine--tRNA<br>ligase<br>glyoxalase      |

hydroxymethylpyrim  
idine/phosphomethyl  
pyrimidine kinase

hypothetical protein  
A4A82\_02240

hypothetical protein  
A4A82\_09265

hypothetical protein  
A4A82\_11275

hypothetical protein  
AXY36\_00580

hypothetical protein  
AXY36\_01150

hypothetical protein  
AXY36\_06600

hypothetical protein  
AXY36\_06780

hypothetical protein  
BSF33\_00215

hypothetical protein  
BSF33\_05765

hypothetical protein  
BSF33\_08575

hypothetical protein  
XA22\_10040

hypoxanthine  
phosphoribosyltransf  
erase

iron ABC transporter  
substrate-binding  
protein

isoleucyl-tRNA  
synthetase, partial

lipid hydroperoxide  
peroxidase

malate  
dehydrogenase  
(acceptor)

malate:quinone  
oxidoreductase  
malonyl CoA-acyl  
carrier protein  
transacylase

manganese-  
dependent inorganic  
pyrophosphatase

membrane protein

metal-dependent  
hydrolase  
molecular chaperone  
DnaK  
molecular chaperone  
GrpE  
  
nucleoside-  
diphosphate kinase  
  
oligoribonuclease  
  
ornithine--oxo-acid  
aminotransferase  
  
peptidase M24  
peptidase M28  
peroxiredoxin  
  
phosphoenolpyruvat  
e-protein  
phosphotransferase  
  
phosphoglycerate  
kinase  
preprotein  
translocase subunit  
SecA  
  
pyruvate  
dehydrogenase  
(acetyl-transferring)  
E1 component  
subunit alpha



pyruvate kinase  
pyruvate oxidase  
  
ribose-phosphate  
pyrophosphokinase  
  
ribosome recycling  
factor  
serine  
hydroxymethyltransf  
erase  
signal recognition  
particle  
single-stranded  
DNA-binding  
protein  
  
stage V sporulation  
protein G  
  
succinate--CoA  
ligase subunit alpha  
  
succinate--CoA  
ligase subunit beta  
superoxide  
dismutase  
thiol reductase  
thioredoxin  
thioredoxin  
thymidine  
phosphorylase  
transaldolase

transcription  
termination/antiterm  
ination protein NusA

transcriptional  
regulator  
transcriptional  
repressor CodY  
transketolase

translation initiation  
factor IF-1

translation initiation  
factor IF-3

transposon DNA-  
invertase

trigger factor  
triose-phosphate  
isomerase

type I glutamate--  
ammonia ligase

type I  
glyceraldehyde-3-  
phosphate  
dehydrogenase

uracil  
phosphoribosyltransf  
erase

uridylate kinase

|  |                                          |                                                             |                                         |                                                         |                                            |                                 |
|--|------------------------------------------|-------------------------------------------------------------|-----------------------------------------|---------------------------------------------------------|--------------------------------------------|---------------------------------|
|  | 50S ribosomal protein L16                | 1-pyrroline-5-carboxylate dehydrogenase                     | 1,4-dihydroxy-2-naphthoyl-CoA synthase  | 2-heptaprenyl-1,4-naphthoquinone methyltransferase MenG | 1-pyrroline-5-carboxylate dehydrogenase    | 2-oxoglutarate dehydrogenase E1 |
|  | adenylosuccinate synthetase              | 2,3-bisphosphoglycerate-independent phosphoglycerate mutase | 1-pyrroline-5-carboxylate dehydrogenase | 30S ribosomal protein S12                               | 2-oxoglutarate dehydrogenase E1 component  | 30S ribosomal protein S1        |
|  | alkyl hydroperoxide reductase subunit F  | 2-succinylbenzoate-CoA ligase                               | 2-oxoisovalerate dehydrogenase          | 50S ribosomal protein L2                                | 30S ribosomal protein S1                   | 30S ribosomal protein S12       |
|  | anti-sigma B factor RsbW                 | 30S ribosomal protein S12                                   | 30S ribosomal protein S10               | 50S ribosomal protein L20                               | 30S ribosomal protein S12                  | 50S ribosomal protein L28       |
|  | aryldialkylphosphatase                   | 30S ribosomal protein S13                                   | 30S ribosomal protein S11               | 50S ribosomal protein L32                               | 3-hydroxy-3-methylglutaryl-CoA reductase   | acetate--CoA ligase             |
|  | glutamine amidotransferase               | 30S ribosomal protein S15                                   | 30S ribosomal protein S13               | 6,7-dimethyl-8-ribityllumazine synthase                 | 3-hydroxyacyl-CoA dehydrogenase            | acetyl-CoA acetyltransferase    |
|  | glutamine-binding periplasmic protein    | 30S ribosomal protein S18                                   | 30S ribosomal protein S18               | aconitate hydratase                                     | 3-oxoacyl-[acyl-carrier protein] reductase | alanine dehydrogenase           |
|  | glutamyl-tRNA amidotransferase           | 30S ribosomal protein S2                                    | 30S ribosomal protein S7                | adenine methyltransferase                               | 50S ribosomal protein L2                   | alcohol dehydrogenase           |
|  | heme ABC transporter ATP-binding protein | 30S ribosomal protein S20                                   | 30S ribosomal protein S9                | alkyl hydroperoxide reductase subunit F                 | 50S ribosomal protein L20                  | autolysin                       |

|                                     |                                                   |                                                   |                                                                 |                                                |                                      |
|-------------------------------------|---------------------------------------------------|---------------------------------------------------|-----------------------------------------------------------------|------------------------------------------------|--------------------------------------|
| hypothetical protein<br>A4A82_05120 | 30S ribosomal<br>protein S21                      | 3-hydroxyacyl-CoA<br>dehydrogenase                | arginine repressor                                              | 50S ribosomal<br>protein L28                   | betaine-aldehyde<br>dehydrogenase    |
| hypothetical protein<br>A4A82_07100 | 3-hydroxy-3-<br>methylglutaryl-CoA<br>reductase   | 3-oxoacyl-[acyl-<br>carrier protein]<br>reductase | aspartyl/glutamyl-<br>tRNA<br>amidotransferase<br>subunit A     | 50S ribosomal<br>protein L35                   | catalase                             |
| hypothetical protein<br>A4A82_08360 | 3-oxoacyl-[acyl-<br>carrier protein]<br>reductase | 5'(3')-<br>deoxyribonucleotida<br>se              | C4-dicarboxylate<br>ABC transporter                             | 50S ribosomal<br>protein L36                   | competence protein<br>ComF           |
| hypothetical protein<br>A4A82_08725 | 50S ribosomal<br>protein L15                      | 50S ribosomal<br>protein L1                       | catalase                                                        | 6,7-dimethyl-8-<br>ribityllumazine<br>synthase | glycerol kinase                      |
| hypothetical protein<br>A4A82_11275 | 50S ribosomal<br>protein L16                      | 50S ribosomal<br>protein L11                      | Chemotaxis-<br>inhibiting protein<br>CHIPS, phage<br>associated | acetate--CoA ligase                            | glycine cleavage<br>system protein T |
| hypothetical protein<br>AXY36_01150 | 50S ribosomal<br>protein L19                      | 50S ribosomal<br>protein L14                      | choline<br>dehydrogenase                                        | acetyl-CoA<br>acetyltransferase                | hypothetical protein<br>A4A82_08945  |
| hypothetical protein<br>AXY36_04620 | 50S ribosomal<br>protein L2                       | 50S ribosomal<br>protein L16                      | CTP synthase                                                    | aconitate hydratase                            | hypothetical protein<br>XA21_11195   |
| hypothetical protein<br>AXY36_08620 | 50S ribosomal<br>protein L20                      | 50S ribosomal<br>protein L19                      | cytochrome aa3<br>quinol oxidase<br>subunit II                  | adenylosuccinate<br>synthetase                 | hypothetical protein<br>XA22_10040   |
| hypothetical protein<br>AXY36_09850 | 50S ribosomal<br>protein L24                      | 50S ribosomal<br>protein L2                       | diaminopimelate<br>decarboxylase                                | alanine<br>dehydrogenase                       | hypothetical protein<br>XA22_11240   |

|                                                     |                                                                                      |                                             |                                                  |                                             |                                             |
|-----------------------------------------------------|--------------------------------------------------------------------------------------|---------------------------------------------|--------------------------------------------------|---------------------------------------------|---------------------------------------------|
| hypothetical protein<br>BSF33_04470                 | 50S ribosomal<br>protein L29                                                         | 50S ribosomal<br>protein L4                 | dihydroorotase                                   | alcohol<br>dehydrogenase                    | lactate<br>dehydrogenase                    |
| hypothetical protein<br>RES9_02800                  | 50S ribosomal<br>protein L32                                                         | 6-<br>phosphogluconolact<br>onase           | DNA polymerase I                                 | aldehyde<br>dehydrogenase<br>family protein | magnesium<br>transporter CorA               |
| integrase                                           | 50S ribosomal<br>protein L36                                                         | acetate kinase                              | DNA-binding<br>response regulator                | alkaline-shock<br>protein                   | mercuric reductase                          |
| L-lactate<br>dehydrogenase                          | 5-<br>methyltetrahydropter<br>oyltriglutamate--<br>homocysteine<br>methyltransferase | acetate--CoA ligase                         | exported protein                                 | alkyl hydroperoxide<br>reductase subunit F  | MFS transporter                             |
| malonyl CoA-acyl<br>carrier protein<br>transacylase | 6,7-dimethyl-8-<br>ribityllumazine<br>synthase                                       | acetyltransferase                           | F0F1 ATP synthase<br>subunit epsilon             | arginine--tRNA<br>ligase                    | serine--tRNA ligase                         |
| membrane protein                                    | 8-amino-7-<br>oxononanoate<br>synthase                                               | alanine<br>dehydrogenase                    | F0F1 ATP synthase<br>subunit gamma               | ArsC family protein                         | succinate<br>dehydrogenase                  |
| methionyl-tRNA<br>formyltransferase                 | acetyl-CoA<br>acetyltransferase                                                      | alcohol<br>dehydrogenase                    | formate C-<br>acetyltransferase                  | aspartate<br>aminotransferase               | sulfurtransferase<br>FdhD                   |
| molecular chaperone<br>GroEL                        | aconitate hydratase                                                                  | aldehyde<br>dehydrogenase<br>family protein | glutamate-1-<br>semialdehyde<br>aminotransferase | aspartate-<br>semialdehyde<br>dehydrogenase | TetR family<br>transcriptional<br>regulator |
| molecular chaperone<br>GrpE                         | adenylosuccinate<br>synthetase                                                       | alkaline shock<br>protein 23                | glutamate-1-<br>semialdehyde-2,1-<br>aminomutase | ATP synthase F0F1<br>subunit B              |                                             |
| pectate lyase                                       | alanine<br>dehydrogenase                                                             | aminopeptidase T                            | glutathione S-<br>transferase                    | ATP synthase F0F1<br>subunit delta          |                                             |

|                                               |                                                             |                                                               |                                                            |                                                  |
|-----------------------------------------------|-------------------------------------------------------------|---------------------------------------------------------------|------------------------------------------------------------|--------------------------------------------------|
| phosphopyruvate<br>hydratase                  | alcohol<br>dehydrogenase                                    | anti-sigma B factor<br>RsbW                                   | glutathione-<br>dependent<br>formaldehyde<br>dehydrogenase | ATPase P                                         |
| plasmid partitioning<br>protein ParB          | alkyl hydroperoxide<br>reductase subunit F                  | AraC family<br>transcriptional<br>regulator                   | glycine cleavage<br>system protein H                       | autolysin                                        |
| pyridoxal<br>biosynthesis protein             | anti-anti-sigma<br>factor                                   | arylamine N-<br>acetyltransferase                             | glycine<br>dehydrogenase<br>subunit 2                      | bacteriophage<br>resistance protein              |
| redox-regulated<br>ATPase YchF                | anti-sigma B factor<br>RsbW                                 | aspartate<br>aminotransferase                                 | glycine/betaine ABC<br>transporter permease                | branched-chain<br>amino acid<br>aminotransferase |
| serine--tRNA ligase                           | ArsC family protein                                         | ATP synthase F0F1<br>subunit alpha                            | histidine kinase                                           | catalase                                         |
| sodium/sulfate<br>symporter family<br>protein | aryldialkylphosphata<br>se                                  | ATP synthase F0F1<br>subunit B                                | Histidine transport<br>protein (permease)                  | choline<br>dehydrogenase                         |
| succinate<br>dehydrogenase                    | aspartate-<br>semialdehyde<br>dehydrogenase                 | ATP-dependent 6-<br>phosphofructokinase                       | HslU--HslV<br>peptidase ATPase<br>subunit                  | citrate synthase                                 |
|                                               | aspartate--tRNA<br>ligase                                   | ATP-dependent Clp<br>protease ATP-<br>binding subunit<br>ClpC | hypothetical protein                                       | class II fumarate<br>hydratase                   |
|                                               | aspartyl/glutamyl-<br>tRNA<br>amidotransferase<br>subunit A | ATP-dependent Clp<br>protease ATP-<br>binding subunit<br>ClpX | hypothetical protein<br>A4A82_03310                        | cobalt ABC<br>transporter ATPase                 |

|                                                     |                                                                                                           |                                  |                                          |
|-----------------------------------------------------|-----------------------------------------------------------------------------------------------------------|----------------------------------|------------------------------------------|
| ATP synthase F0F1 subunit alpha                     | ATP-dependent DNA helicase RecG                                                                           | hypothetical protein A4A82_05660 | cytochrome aa3 quinol oxidase subunit II |
| ATP synthase F0F1 subunit delta                     | ATP-dependent Zn metalloproteinase                                                                        | hypothetical protein A4A82_06485 | D-alanine--D-alanine ligase              |
| ATP synthase F0F1 subunit gamma                     | autolysin                                                                                                 | hypothetical protein A4A82_08360 | dihydrolipoamide succinyltransferase     |
| ATPase P                                            | bifunctional 5,10-methylene-tetrahydrofolate dehydrogenase/5,10-methylene-tetrahydrofolate cyclohydrolase | hypothetical protein A4A82_09985 | dihydroxyacetone kinase                  |
| ATP-dependent Clp protease ATP-binding subunit ClpC | branched-chain amino acid aminotransferase                                                                | hypothetical protein A4A82_10705 | dihydroxyacetone kinase subunit L        |
| ATP-dependent DNA helicase RecG                     | catalase                                                                                                  | hypothetical protein A4A82_11275 | DNA gyrase subunit A                     |
| autolysin                                           | CBS domain-containing protein                                                                             | hypothetical protein AXY36_03305 | DNA primase                              |

|                                                                                                           |                                                                              |                                  |                                                       |
|-----------------------------------------------------------------------------------------------------------|------------------------------------------------------------------------------|----------------------------------|-------------------------------------------------------|
| bifunctional 5,10-methylene-tetrahydrofolate dehydrogenase/5,10-methylene-tetrahydrofolate cyclohydrolase | cell division protein FtsA                                                   | hypothetical protein AXY36_03940 | DNA repair protein                                    |
| bifunctional ornithine acetyltransferase/N-acetylglutamate synthase                                       | chorismate synthase                                                          | hypothetical protein AXY36_07550 | elastin-binding protein                               |
| branched-chain amino acid aminotransferase                                                                | citrate synthase                                                             | hypothetical protein BSF33_01790 | endopeptidase Clp ATP-binding subunit C               |
| Cadmium-transporting ATPase                                                                               | class II fumarate hydratase                                                  | hypothetical protein BSF33_05110 | excinuclease ABC subunit C                            |
| catalase                                                                                                  | cobalamin Fe <sup>3+</sup> -siderophores ABC transporter periplasmic protein | hypothetical protein BSF33_06845 | ferrichrome ABC transporter substrate-binding protein |
| cell division protein DivIVA                                                                              | cobalt ABC transporter permease                                              | hypothetical protein BSF33_08575 | Fis family transcriptional regulator                  |
| chorismate mutase                                                                                         | competence protein ComG                                                      | hypothetical protein XA21_08700  | formate C-acetyltransferase                           |



|                                         |                                                |                                                              |                                                            |
|-----------------------------------------|------------------------------------------------|--------------------------------------------------------------|------------------------------------------------------------|
| citrate synthase                        | cysteine synthase                              | hypothetical protein<br>XA21_13400                           | formate--<br>tetrahydrofolate<br>ligase                    |
| class A beta-<br>lactamase              | cytidylate kinase                              | imidazolonepropion<br>ase                                    | gas vesicle protein-<br>protein                            |
| cold-shock protein                      | cytochrome aa3<br>quinol oxidase<br>subunit I  | lactate<br>dehydrogenase                                     | glutamate synthase<br>subunit beta                         |
| coproporphyrinogen<br>III oxidase       | cytochrome aa3<br>quinol oxidase<br>subunit II | leucyl<br>aminopeptidase                                     | glutamate-1-<br>semialdehyde<br>aminotransferase           |
| cystathionine gamma-<br>synthase        | D-alanine--D-<br>alanine ligase                | lipoyl synthase                                              | glutamine--fructose-<br>6-phosphate<br>aminotransferase    |
| DEAD/DEAH box<br>helicase               | deoxyribose-<br>phosphate aldolase             | membrane protein                                             | glutaryl-CoA<br>dehydrogenase                              |
| dihydrolipoamide<br>succinyltransferase | diaminopimelate<br>decarboxylase               | mevalonate kinase                                            | glutathione-<br>dependent<br>formaldehyde<br>dehydrogenase |
| dihydroxyacetone<br>kinase subunit L    | dihydrolipoamide<br>succinyltransferase        | molecular chaperone<br>GroEL                                 | glycerol phosphate<br>lipoteichoic acid<br>synthase        |
| DNA<br>methyltransferase                | dihydrolipoyl<br>dehydrogenase                 | NAD-dependent<br>succinate-<br>semialdehyde<br>dehydrogenase | glycine C-<br>acetyltransferase                            |

|                                         |                                                       |                                             |                                     |
|-----------------------------------------|-------------------------------------------------------|---------------------------------------------|-------------------------------------|
| DNA primase                             | dihydroxyacetone kinase                               | NADP-dependent oxidoreductase               | glycine cleavage system protein H   |
| DNA-binding protein                     | DNA methyltransferase                                 | nitric oxide dioxygenase                    | glycine cleavage system protein T   |
| elastin-binding protein                 | DNA mismatch repair protein MutS                      | oligopeptidase PepB                         | glycine dehydrogenase               |
| endopeptidase Clp ATP-binding subunit C | DNA-directed RNA polymerase subunit omega             | peptide ABC transporter ATP-binding protein | glycine dehydrogenase subunit 2     |
| endoribonuclease L-PSP                  | elastin-binding protein                               | phage tail tape measure protein             | heme-binding protein                |
| Fis family transcriptional regulator    | elongation factor P                                   | Phosphate acetyltransferase                 | HslU--HslV peptidase ATPase subunit |
| formate acetyltransferase               | endoribonuclease L-PSP                                | Phosphoglycerate mutase                     | hydroxyacid dehydrogenase           |
| formate--tetrahydrofolate ligase        | F0F1 ATP synthase subunit beta                        | phosphotransferase                          | hypothetical protein A4A82_02065    |
| gas vesicle protein-protein             | F0F1 ATP synthase subunit gamma                       | porphobilinogen deaminase                   | hypothetical protein A4A82_05255    |
| general stress protein                  | ferrichrome ABC transporter substrate-binding protein | pyridoxal biosynthesis protein              | hypothetical protein A4A82_06485    |
| glutamate dehydrogenase                 | Fis family transcriptional regulator                  | pyrroline-5-carboxylate reductase           | hypothetical protein A4A82_07220    |

|                                                  |                                                  |                                                               |                                  |
|--------------------------------------------------|--------------------------------------------------|---------------------------------------------------------------|----------------------------------|
| glutamine-binding periplasmic protein            | formate C-acetyltransferase                      | pyruvate phosphate dikinase                                   | hypothetical protein A4A82_08945 |
| glutamine--fructose-6-phosphate aminotransferase | formate dehydrogenase                            | recombinase A                                                 | hypothetical protein A4A82_11260 |
| glutamine-hydrolyzing GMP synthase               | formate--tetrahydrofolate ligase                 | recombinase RecB                                              | hypothetical protein A4A82_12170 |
| glutamyl-tRNA amidotransferase                   | fructose 1,6-bisphosphatase                      | redox-regulated ATPase YchF                                   | hypothetical protein AXY36_01585 |
| glutaryl-CoA dehydrogenase                       | gas vesicle protein-protein                      | restriction endonuclease subunit R                            | hypothetical protein AXY36_04620 |
| glycerol-3-phosphate cytidyltransferase          | general stress protein                           | ribonuclease J                                                | hypothetical protein AXY36_07245 |
| glycine dehydrogenase subunit 2                  | glutamate dehydrogenase                          | ribonuclease Y                                                | hypothetical protein AXY36_07550 |
| glycosyl transferase family 2                    | glutamate-1-semialdehyde-2,1-aminomutase         | Ribonucleotide reductase of class Ib (aerobic), alpha subunit | hypothetical protein AXY36_07855 |
| heme-binding protein                             | glutamine--fructose-6-phosphate aminotransferase | ribose ABC transporter permease                               | hypothetical protein AXY36_08170 |

+ 200 + 300 mg

|                                     |                                                   |                                                    |                                              |
|-------------------------------------|---------------------------------------------------|----------------------------------------------------|----------------------------------------------|
| hypothetical protein<br>A4A82_02240 | glutaryl-CoA<br>dehydrogenase                     | S1 RNA-binding<br>protein                          | hypothetical protein<br>AXY36_11375          |
| hypothetical protein<br>A4A82_03560 | glycerol kinase                                   | serine--tRNA ligase                                | hypothetical protein<br>BSF33_00755          |
| hypothetical protein<br>A4A82_03720 | Glycine cleavage<br>system H protein              | signal transduction<br>protein TRAP                | hypothetical protein<br>BSF33_06845          |
| hypothetical protein<br>A4A82_03945 | glycine cleavage<br>system protein H              | smooth muscle<br>caldesmon                         | hypothetical protein<br>RES9_00450           |
| hypothetical protein<br>A4A82_05255 | glycine cleavage<br>system protein T              | succinate<br>dehydrogenase iron-<br>sulfur subunit | hypothetical protein<br>UF66_2387            |
| hypothetical protein<br>A4A82_06485 | glycine<br>dehydrogenase                          | succinate-<br>semialdehyde<br>dehydrogenase        | hypothetical protein<br>XA21_04180           |
| hypothetical protein<br>A4A82_07220 | glycoprotease                                     | tetrahydrodipicolinat<br>e acetyltransferase       | hypothetical protein<br>XA21_13400           |
| hypothetical protein<br>A4A82_08360 | glyoxal reductase                                 | thioredoxin<br>reductase                           | imidazolonepropion<br>ase                    |
| hypothetical protein<br>A4A82_09265 | Hg(II)-responsive<br>transcriptional<br>regulator | uroporphyrinogen<br>decarboxylase                  | inorganic<br>pyrophosphatase                 |
| hypothetical protein<br>A4A82_10890 | Holliday junction<br>resolvase                    | xylulose kinase                                    | inosine-5-<br>monophosphate<br>dehydrogenase |

|                                     |                                     |                                                            |
|-------------------------------------|-------------------------------------|------------------------------------------------------------|
| hypothetical protein<br>A4A82_11275 | Homoserine<br>dehydrogenase         | iron ABC transporter<br>ATP-binding protein                |
| hypothetical protein<br>AXY36_00980 | Homoserine kinase                   | isoleucine--tRNA<br>ligase                                 |
| hypothetical protein<br>AXY36_02580 | hydroxyacid<br>dehydrogenase        | lactate<br>dehydrogenase                                   |
| hypothetical protein<br>AXY36_06600 | hypothetical protein                | late competence<br>protein ComEC                           |
| hypothetical protein<br>AXY36_06780 | hypothetical protein<br>A4A82_02240 | lipoate--protein<br>ligase                                 |
| hypothetical protein<br>AXY36_07550 | hypothetical protein<br>A4A82_03645 | L-Proline/Glycine<br>betaine transporter<br>ProP           |
| hypothetical protein<br>AXY36_07855 | hypothetical protein<br>A4A82_03720 | malate<br>dehydrogenase                                    |
| hypothetical protein<br>AXY36_09360 | hypothetical protein<br>A4A82_07425 | manganese ABC<br>transporter substrate-<br>binding protein |
| hypothetical protein<br>BSF33_00525 | hypothetical protein<br>A4A82_12125 | methionine sulfoxide<br>reductase                          |
| hypothetical protein<br>BSF33_00755 | hypothetical protein<br>A4A82_12320 | molecular chaperone<br>GroEL                               |

|                                                      |                                     |                                                             |
|------------------------------------------------------|-------------------------------------|-------------------------------------------------------------|
| hypothetical protein<br>RES9_02800                   | hypothetical protein<br>AXY36_00580 | monovalent<br>cation/H <sup>+</sup> antiporter<br>subunit D |
| hypothetical protein<br>XA22_13430                   | hypothetical protein<br>AXY36_03955 | N-acetyltransferase                                         |
| IMP dehydrogenase                                    | hypothetical protein<br>AXY36_04620 | NAD-dependent<br>dehydratase                                |
| inorganic<br>pyrophosphatase                         | hypothetical protein<br>AXY36_06600 | nitric oxide<br>dioxygenase                                 |
| iron ABC transporter<br>substrate-binding<br>protein | hypothetical protein<br>AXY36_09360 | NmrA family protein                                         |
| isoleucine--tRNA<br>ligase                           | hypothetical protein<br>AXY36_09565 | oxidoreductase                                              |
| isoleucyl-tRNA<br>synthetase, partial                | hypothetical protein<br>BSF33_05765 | peptidase M23                                               |
| lactate<br>dehydrogenase                             | hypothetical protein<br>BSF33_09115 | peptide ABC<br>transporter ATP-<br>binding protein          |
| late competence<br>protein ComEC                     | hypothetical protein<br>BSF33_11000 | peptide ABC<br>transporter substrate-<br>binding protein    |

|                                                            |                                       |                                             |
|------------------------------------------------------------|---------------------------------------|---------------------------------------------|
| L-lactate dehydrogenase                                    | hypothetical protein<br>RES10_11420   | permease                                    |
| luciferase                                                 | hypothetical protein<br>RES11_11325   | Phage antirepressor<br>protein              |
| lysine--tRNA ligase                                        | hypothetical protein<br>UF66_0386     | PhoP family<br>transcriptional<br>regulator |
| LysR family<br>transcriptional<br>regulator                | hypothetical protein<br>UF66_1428     | phosphoenolpyruvat<br>e carboxykinase       |
| malonyl CoA-acyl<br>carrier protein<br>transacylase        | hypothetical protein<br>XA21_11830    | Phosphoglycerate<br>mutase                  |
| manganese ABC<br>transporter substrate-<br>binding protein | iditol 2-<br>dehydrogenase            | phosphopentomutase                          |
| methionine sulfoxide<br>reductase                          | inorganic<br>pyrophosphatase          | phosphotransferase                          |
| molecular chaperone<br>GroEL                               | isochorismate<br>synthase             | polynucleotide<br>phosphorylase             |
| molecular chaperone<br>GrpE                                | isocitrate<br>dehydrogenase           | proline<br>dehydrogenase                    |
| nitric oxide<br>dioxygenase                                | isoleucyl-tRNA<br>synthetase, partial | protease                                    |
| nucleoside-<br>diphosphate kinase                          | lactate<br>dehydrogenase              | protein rlx                                 |

|                                                        |                                        |                                                     |
|--------------------------------------------------------|----------------------------------------|-----------------------------------------------------|
| ornithine--oxo-acid<br>aminotransferase                | leucine--tRNA<br>ligase                | proteinase                                          |
| permease                                               | lipid hydroperoxide<br>peroxidase      | purine-nucleoside<br>phosphorylase                  |
| peroxiredoxin                                          | Major myo-inositol<br>transporter IolT | putative membrane<br>protein                        |
| Phosphate<br>acetyltransferase                         | manganese<br>transporter               | pyridine nucleotide-<br>disulfide<br>oxidoreductase |
| phosphoenolpyruvat<br>e carboxykinase                  | membrane protein                       | pyridoxal<br>biosynthesis protein                   |
| phosphonate ABC<br>transporter ATP-<br>binding protein | methionine--tRNA<br>ligase             | pyrimidine-<br>nucleoside<br>phosphorylase          |
| PTS mannose<br>transporter subunit<br>IIA              | molecular chaperone<br>DnaK            | pyrroline-5-<br>carboxylate<br>reductase            |
| putative membrane<br>protein                           | molecular chaperone<br>GroEL           | pyruvate phosphate<br>dikinase                      |
| pyridoxal<br>biosynthesis protein                      | nitric oxide<br>dioxygenase            | recombinase A                                       |



|                                     |                                                |                                                |
|-------------------------------------|------------------------------------------------|------------------------------------------------|
| pyruvate phosphate dikinase         | non-canonical purine NTP pyrophosphatase       | recombinase RecB                               |
| pyruvate, phosphate dikinase        | nucleoside-diphosphate kinase                  | ribonuclease H                                 |
| Repressor CsoR of the copZA operon  | ornithine--oxo-acid aminotransferase           | ribosome-associated protein Y                  |
| RNA-binding protein                 | ornithine--oxo-acid transaminase               | RNA polymerase sigma factor RpoD               |
| RNA-binding protein S1              | peptidase M28                                  | septation ring formation regulator EzrA        |
| serine--tRNA ligase                 | peptide deformylase                            | serine--tRNA ligase                            |
| sigma-54 modulation protein         | phosphoenolpyruvate carboxykinase              | succinate dehydrogenase flavoprotein subunit   |
| signal recognition particle         | phosphoenolpyruvate-protein phosphotransferase | succinate dehydrogenase iron-sulfur subunit    |
| single-stranded DNA-binding protein | phospholipase D                                | succinate-semialdehyde dehydrogenase (NADP(+)) |

succinate  
dehydrogenase  
flavoprotein subunit

plasmid partitioning  
protein ParB

succinate  
dehydrogenase iron-  
sulfur subunit

PP family ATPase

sucrose-6-phosphate  
hydrolase

preprotein  
translocase subunit  
SecA

sugar dehydrogenase

prolyl-tRNA  
synthetase

PTS mannitol  
transporter subunit  
IIA

ThiJ/PfpI family  
protein

putative  
acyltransferase

thiol reductase  
thioredoxin

pyridoxal  
biosynthesis protein

thioredoxin

pyruvate, phosphate  
dikinase

thymidine  
phosphorylase

recombinase A

TIGR00268 family  
protein

response regulator  
SirA

succinyl-  
diaminopimelate  
desuccinylase

sulfurtransferase  
FdhD

sugar dehydrogenase

sulfurtransferase

tail protein

teichoic acid  
biosynthesis protein

ThiJ/PfpI family  
protein

transcription  
termination/antiterm  
ination protein NusG

transglycosylase

translation initiation  
factor IF-2

|                                                    |                                                        |                                                                                                     |
|----------------------------------------------------|--------------------------------------------------------|-----------------------------------------------------------------------------------------------------|
| transcriptional<br>regulator                       | restriction<br>endonuclease<br>subunit M               | two-component<br>response regulator,<br>LytR                                                        |
| Translation<br>elongation factor Ts                | ribosome recycling<br>factor                           | undecaprenyldiphos<br>pho-<br>muramoylpentapepti<br>de beta-N-<br>acetylglucosaminyltr<br>ansferase |
| translation initiation<br>factor IF-3              | RNA<br>pseudouridylate<br>synthase                     | universal stress<br>protein                                                                         |
| tRNA and rRNA<br>cytosine-C5-<br>methylase         | Rrf2 family<br>transcriptional<br>regulator            | universal stress<br>protein UspA                                                                    |
| two-component<br>response regulator,<br>LytR       | S-<br>adenosylmethionine<br>tRNA<br>ribosyltransferase | Urease accessory<br>protein UreG                                                                    |
| type I glutamate--<br>ammonia ligase               | serine dehydratase                                     | uroporphyrinogen<br>decarboxylase                                                                   |
| UDP-glucose 4-<br>epimerase                        | serine--tRNA ligase                                    |                                                                                                     |
| universal stress<br>protein                        | siderophore<br>synthetase                              |                                                                                                     |
| UTP-glucose-1-<br>phosphate<br>uridylyltransferase | signal transduction<br>protein TRAP                    |                                                                                                     |
|                                                    | succinate<br>dehydrogenase                             |                                                                                                     |

succinate  
dehydrogenase  
flavoprotein subunit

succinate--CoA  
ligase subunit alpha

succinate--CoA  
ligase subunit beta

succinate-  
semialdehyde  
dehydrogenase  
sulfurtransferase

TetR family  
transcriptional  
regulator

tetrahydrodipicolinat  
e acetyltransferase

ThiJ/PfpI family  
protein

Transcription  
regulator (contains  
diacylglycerol kinase  
catalytic domain)

transcriptional  
repressor CodY  
transglycosylase

transposase, IS605  
OrfB family

transposase, partial

triose-phosphate  
isomerase

tRNA-binding  
protein

type I glutamate--  
ammonia ligase

universal stress  
protein UspA

uracil

phosphoribosyltransf  
erase
