# Supplementary material for: Proteomic response of marine-derived Staphylococcus cohnii #NIOSBK35 to varying Cr(vi) concentrations
Source: Royal Society of Chemistry journal article supplement (doi:10.1039/c9mt00089e), 2019-06-13

## Venn diagrams representing number of up-regulated proteins at different time points and concentrations

At 6 h

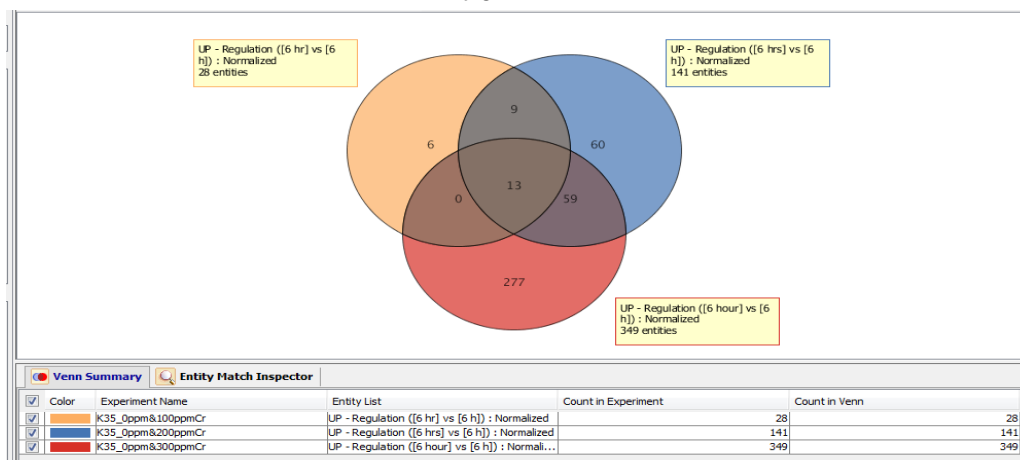

At 9 h

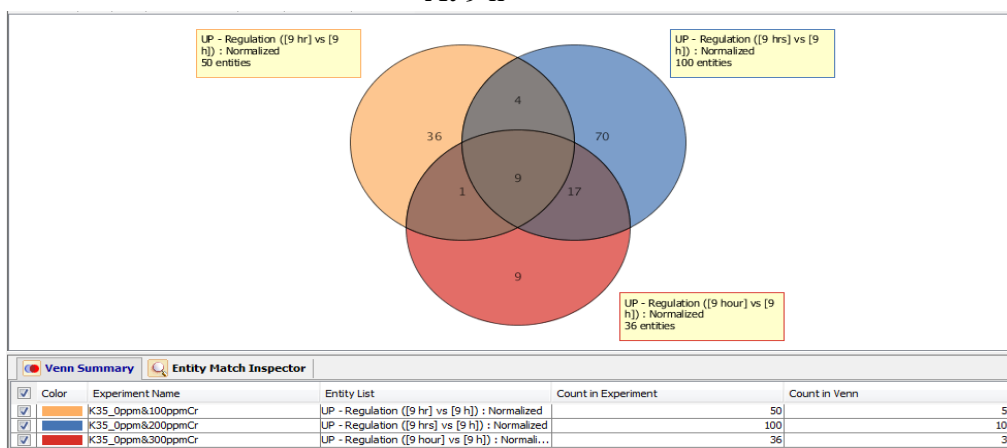

At 12 h

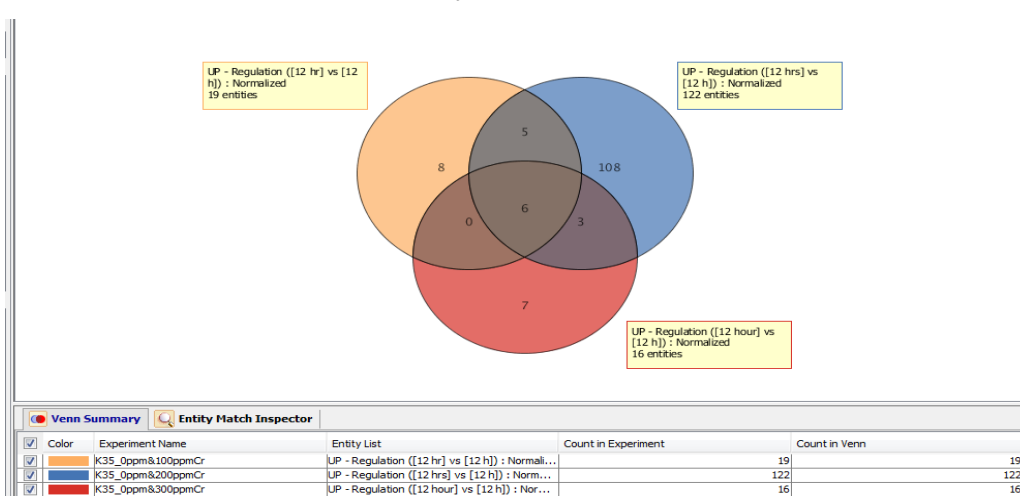

## At 18 h

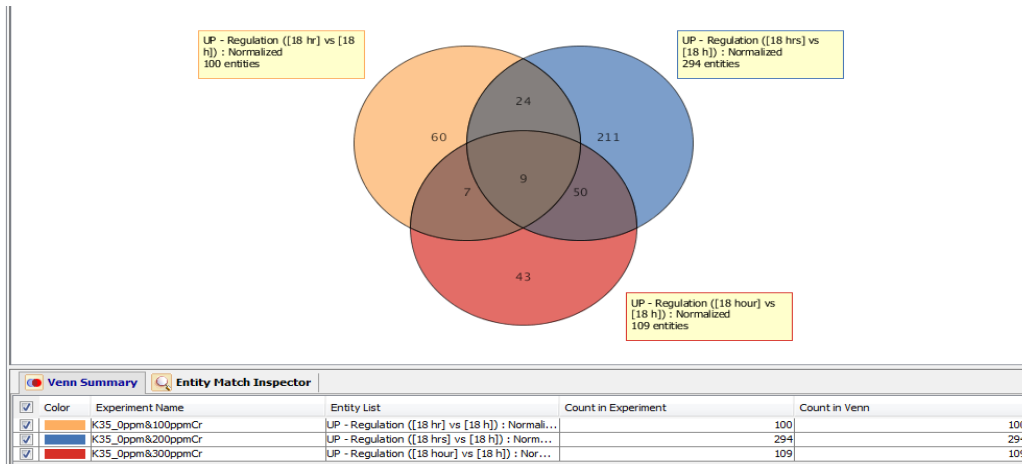

## At 24 h

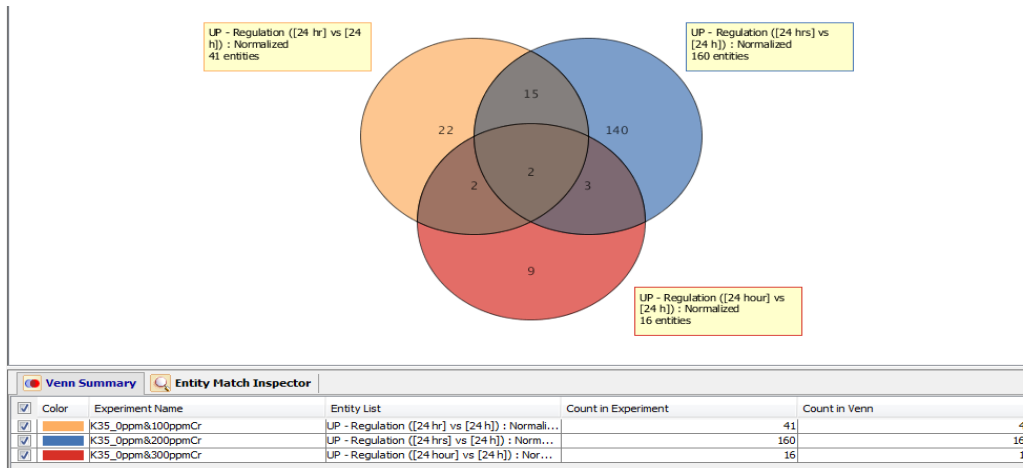

## At 36 h

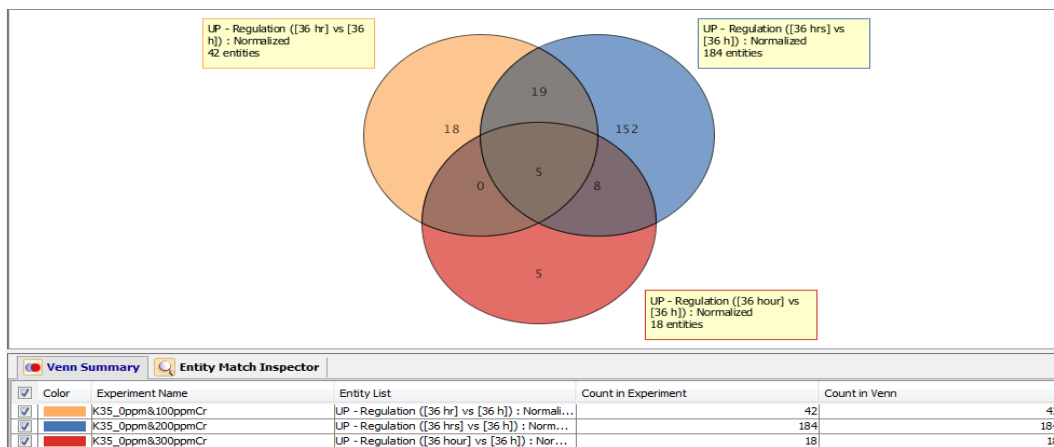

Venn diagrams representing number of down-regulated proteins at different time points and concentrations

At 6 h

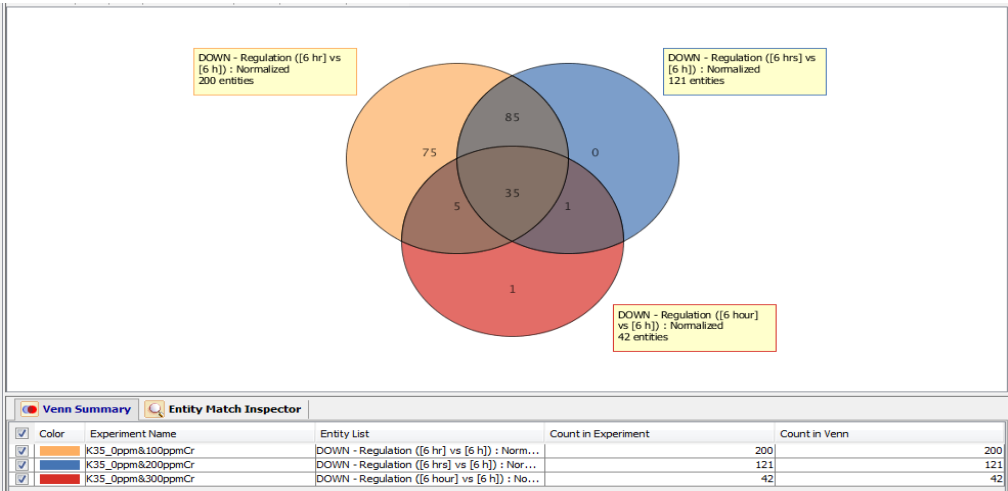

At 9 h

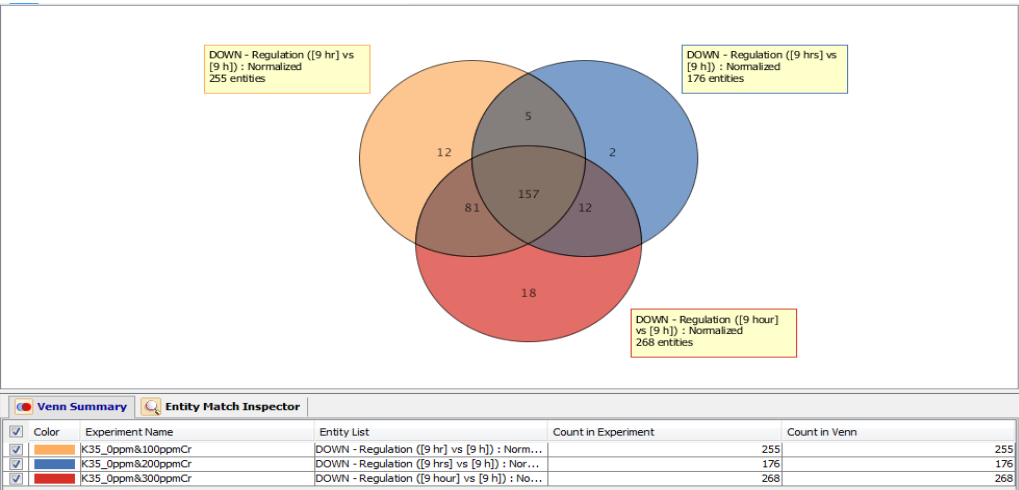

At 12 h

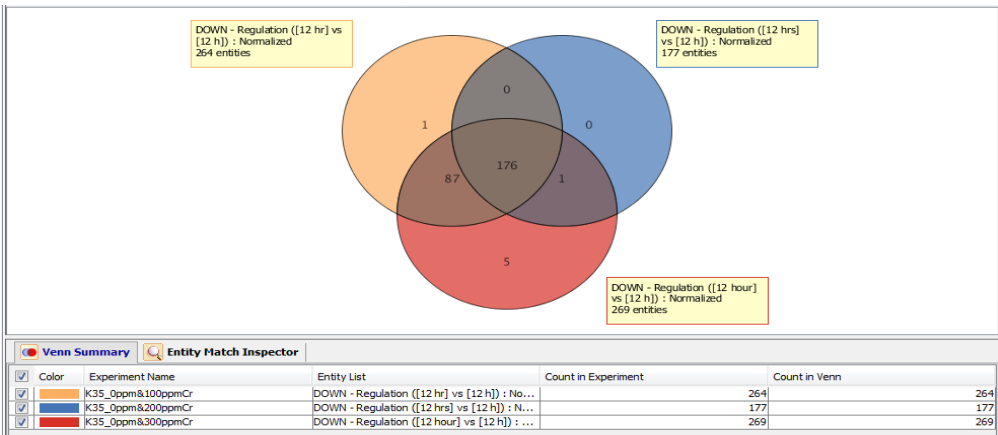

## At 18 h

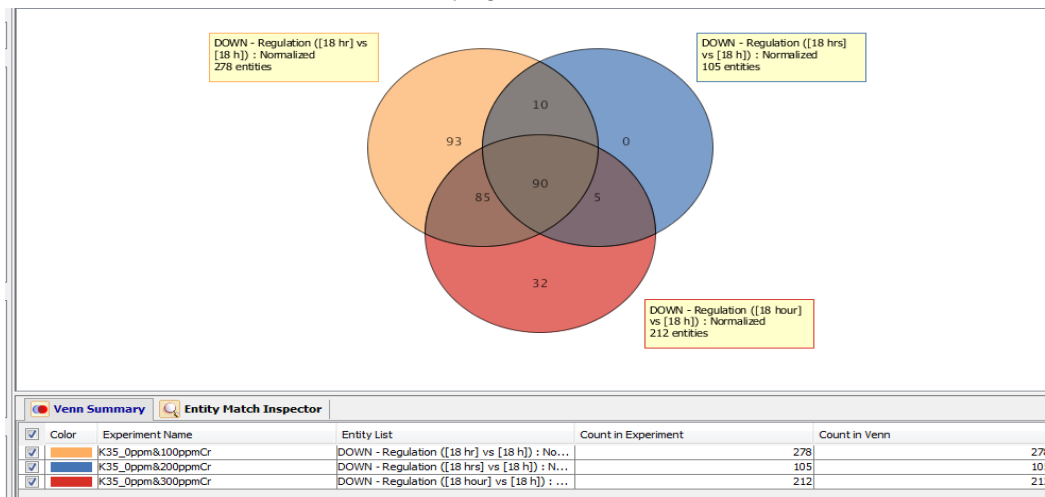

## At 24 h

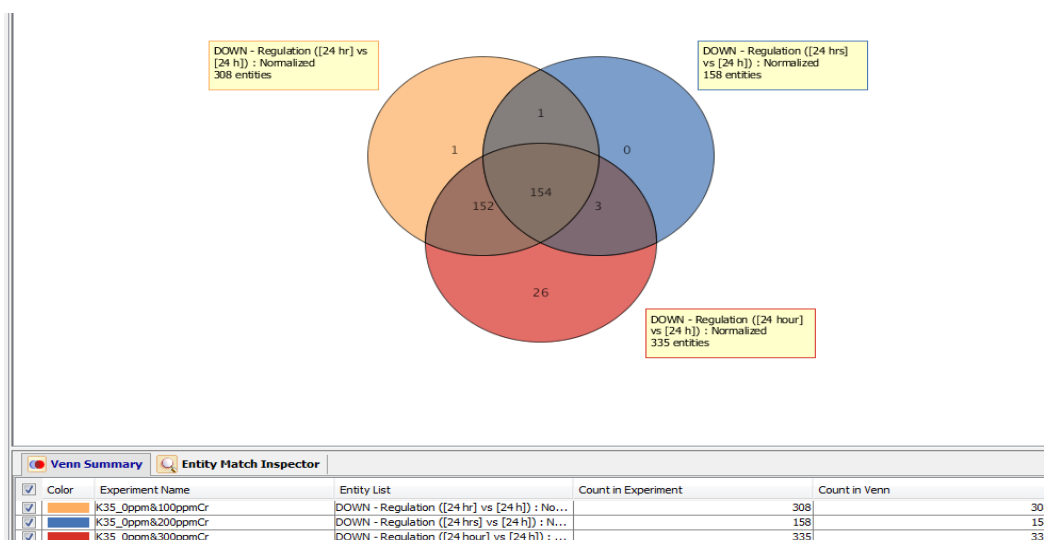

## At 36 h

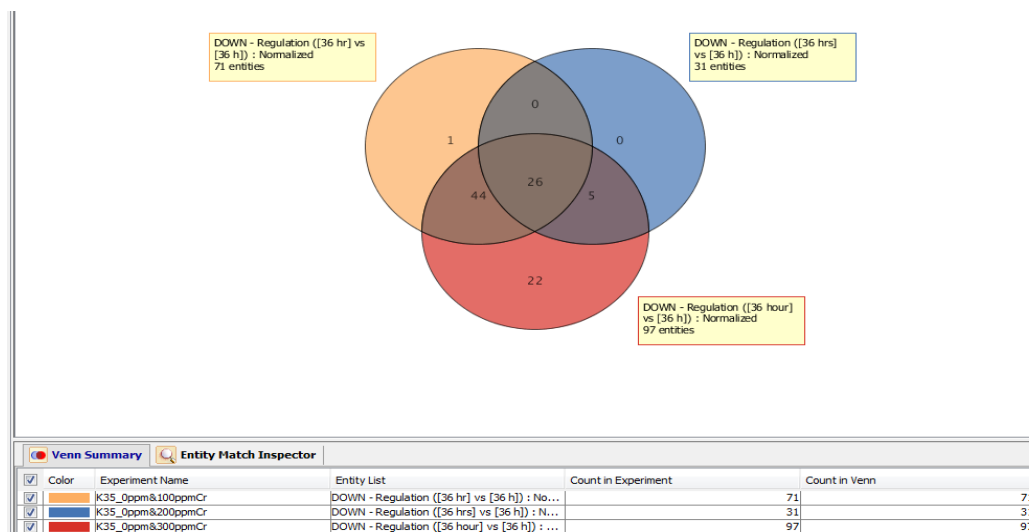

Supplement: c9mt00089e3.pdf [file c9mt00089e3.pdf]
